# Supplementary material for: Nutritional habits and levels of physical activity during pregnancy, birth and the postpartum period of women in Toledo (Spain): study protocol for a two-year prospective cohort study (the PrePaN study)
Source: PubMed Central journal article supplement — BMJ Open. 2019 Jul 30;9(7):e029487. doi: 10.1136/bmjopen-2019-029487 (PMC6677987; doi:10.1136/bmjopen-2019-029487), 2019-07-30
Supplement: bmjopen-2019-029487.draft_revisions.pdf [file bmjopen-2019-029487.draft_revisions.pdf]

# BMJ Open

BMJ Open is committed to open peer review. As part of this commitment we make the peer review history of every article we publish publicly available.

When an article is published we post the peer reviewers' comments and the authors' responses online. We also post the versions of the paper that were used during peer review. These are the versions that the peer review comments apply to.

The versions of the paper that follow are the versions that were submitted during the peer review process. They are not the versions of record or the final published versions. They should not be cited or distributed as the published version of this manuscript.

BMJ Open is an open access journal and the full, final, typeset and author-corrected version of record of the manuscript is available on our site with no access controls, subscription charges or pay-per-view fees (<http://bmjopen.bmj.com>).

If you have any questions on BMJ Open's open peer review process please email [info.bmjopen@bmj.com](mailto:info.bmjopen@bmj.com)

# BMJ Open

**Analysis of nutritional habits and levels of physical activity together with the consequences of the same during pregnancy, birth and the postpartum period of women in health area no. 1, Toledo (Spain). PrePaN Study.**

|                               |                                                                                                                                                                                                                                                                                                                                                                                                                                                                                                                                                                                                                                                                                                                                                                                                                                                                                                                                                                                                                                                                                                                                                                                                                                                                                                                                                                                                                                |
|-------------------------------|--------------------------------------------------------------------------------------------------------------------------------------------------------------------------------------------------------------------------------------------------------------------------------------------------------------------------------------------------------------------------------------------------------------------------------------------------------------------------------------------------------------------------------------------------------------------------------------------------------------------------------------------------------------------------------------------------------------------------------------------------------------------------------------------------------------------------------------------------------------------------------------------------------------------------------------------------------------------------------------------------------------------------------------------------------------------------------------------------------------------------------------------------------------------------------------------------------------------------------------------------------------------------------------------------------------------------------------------------------------------------------------------------------------------------------|
| Journal:                      | <i>BMJ Open</i>                                                                                                                                                                                                                                                                                                                                                                                                                                                                                                                                                                                                                                                                                                                                                                                                                                                                                                                                                                                                                                                                                                                                                                                                                                                                                                                                                                                                                |
| Manuscript ID                 | bmjopen-2019-029487                                                                                                                                                                                                                                                                                                                                                                                                                                                                                                                                                                                                                                                                                                                                                                                                                                                                                                                                                                                                                                                                                                                                                                                                                                                                                                                                                                                                            |
| Article Type:                 | Protocol                                                                                                                                                                                                                                                                                                                                                                                                                                                                                                                                                                                                                                                                                                                                                                                                                                                                                                                                                                                                                                                                                                                                                                                                                                                                                                                                                                                                                       |
| Date Submitted by the Author: | 31-Jan-2019                                                                                                                                                                                                                                                                                                                                                                                                                                                                                                                                                                                                                                                                                                                                                                                                                                                                                                                                                                                                                                                                                                                                                                                                                                                                                                                                                                                                                    |
| Complete List of Authors:     | <p>Muñoz Muñoz, Aránzazu; Universidad de Castilla-La Mancha - Campus de Toledo, Nursing, Physiotherapy and Occupational Therapy Department; Buenavista Primary Care Centre, SESCOAM.</p> <p>Cantarino, Sagrario; Universidad de Castilla-La Mancha - Campus de Toledo, Nursing, Physiotherapy and Occupational Therapy Department, De Dios Aguado, María de las Mercedes; Universidad de Castilla-La Mancha - Campus de Toledo, Nursing, Physiotherapy and Occupational Therapy Department;; Yepes Primary Care Centre</p> <p>Velasco Abellán, Minerva; Universidad de Castilla-La Mancha - Campus de Toledo, Nursing, Physiotherapy and Occupational Therapy Department;; Department of Emergency. Castilla-La Mancha Health System</p> <p>González López, Beatriz; Universidad de Castilla-La Mancha - Campus de Toledo, Nursing, Physiotherapy and Occupational Therapy Department;; Polan Primary Care Centre</p> <p>Molina Gallego, Brigida; Universidad de Castilla-La Mancha - Campus de Toledo, Nursing, Physiotherapy and Occupational Therapy Department;; FENNSI Group, Hospital Nacional de Paraplégicos</p> <p>González Pascual, Juan Luis; Universidad Europea de Madrid, School of Biomedical and Health Sciences; Nursing Department.</p> <p>Arias Palencia, Natalia María; Universidad de Castilla- La Mancha, School of Education; Universidad de castilla- La Mancha, Health and Social Research Center</p> |
| Keywords:                     | accelerometer, pregnancy outcomes, physical activity, neonatal outcomes                                                                                                                                                                                                                                                                                                                                                                                                                                                                                                                                                                                                                                                                                                                                                                                                                                                                                                                                                                                                                                                                                                                                                                                                                                                                                                                                                        |
|                               |                                                                                                                                                                                                                                                                                                                                                                                                                                                                                                                                                                                                                                                                                                                                                                                                                                                                                                                                                                                                                                                                                                                                                                                                                                                                                                                                                                                                                                |

SCHOLARONE™  
Manuscripts

1  
2  
3 **Analysis of nutritional habits and levels of physical activity together with the**  
4 **consequences of the same during pregnancy, birth and the postpartum period of**  
5 **women in health area no. 1, Toledo (Spain). PrePaN Study.**  
6  
7

8 Muñoz Muñoz, Aránzazu <sup>1,2</sup>; Gómez Cantarino, Sagrario<sup>1</sup>; De Dios Aguado, María De  
9 Las Mercedes <sup>1,3</sup>; Velasco Abellán, Minerva <sup>1,4</sup>; González López, Beatriz <sup>1,5</sup>; Molina  
10 Gallego, Brígida <sup>1,6</sup>; González Pascual, Juan Luis <sup>7</sup>; Arias Palencia, Natalia María <sup>8,9</sup>.  
11  
12

13  
14 1- ENDOCU Group, University School of Nursing and Physiotherapy Toledo (Nursing,  
15 pain and Care), Toledo, Spain.

16 2- Buenavista Primary Care Centre, SESCAM, Toledo, Spain.

17 3- Yepes Primary Centre, SESCAM, Toledo, Spain.

18 4- Department of Emergency. Castilla-La Mancha Health System, Toledo, Spain.

19 5- Polan Primary Care Centre, SESCAM, Toledo, Spain

20 6- FENNSI Group, Hospital Nacional de Parapléjicos, SESCAM, Toledo, Spain.

21 7- School of Biomedical and Health Sciences; Nursing Department. Universidad Europea  
22 de Madrid, Madrid, Spain.

23 8- School of Education, Universidad de Castilla-La Mancha, Cuenca, Spain.

24 9- Health and Social Research Center, Universidad de Castilla-La Mancha, Cuenca,  
25 Spain.  
26

27 E-mails authors:  
28

29 [ara\\_mnz@hotmail.com](mailto:ara_mnz@hotmail.com)

30 [Sagrario.gomez@uclm.es](mailto:Sagrario.gomez@uclm.es)

31 [mded@sescam.jccm.es](mailto:mded@sescam.jccm.es)

32 [minerva.velasco@uclm.es](mailto:minerva.velasco@uclm.es)

33 [begolo@sescam.jccm.es](mailto:begolo@sescam.jccm.es)

34 [Brigida.molina@uclm.es](mailto:Brigida.molina@uclm.es)

35 [juanluis.gonzalez2@universidadeuropea.es](mailto:juanluis.gonzalez2@universidadeuropea.es)

36 [Natalia.arias@uclm.es](mailto:Natalia.arias@uclm.es)  
37  
38

39 Corresponding author:  
40

41 Sagrario Gómez Cantarino. Department of Nursing, Physiotherapy and occupational  
42 therapy. School of Nursing and Physiotherapy Toledo, University of Castilla- La Mancha,  
43 Toledo, Spain.

44 Avd/ Carlos III s/n, 45071, Toledo, Spain.

45 [Sagrario.gomez@uclm.es](mailto:Sagrario.gomez@uclm.es)

46 +34670225048  
47  
48

49 **Key words:** accelerometer, neonatal outcomes, physical activity, pregnancy outcomes.  
50

51 **Word count:** 2787  
52  
53  
54  
55

## Abstract

Introduction: Pregnant women who eat a balanced diet usually practice physical activity (PA) regularly; there are many studies on PA during pregnancy and the results for the mother and baby. However, the guideline for PA during pregnancy is very general and is not quantified.

Objectives: To examine the nutritional habits and levels of PA of women during pregnancy and the postpartum period using validated questionnaires and accelerometers. Secondly, it will determine the effects of these aspects on the mother and newborn baby. Its third objective is to identify the factors which influence the practice of PA during this phase.

Methods and analysis: This is a prospective cohort study lasting two years. The sample will be recruited in three Primary Care centers in the Toledo (Spain) health area. The participants will be pregnant women aged from 18 to 40 years old who attended all the check-ups during their pregnancy and postpartum period. PA will be quantified using a GT3X (ActiGraph) accelerometer, while nutritional habits and physical exercise will be evaluated using validated questionnaires. The symptoms of pregnancy and the postpartum period will be recorded, together with biochemical parameters and anthropometric data. The primary outcomes will be determined in the pregnant women: weight gain, the incidence of gestational diabetes mellitus, pre-eclampsia and pregnancy-induced hypertension. Secondary outcomes include duration of pregnancy and weight at birth, Apgar score (1 min/ 5 min), type of reanimation (I/II/III/IV), and umbilical cord blood pH in the newborn babies.

Discussion: although the beneficial effects of PA during pregnancy are known, there is a need to perform studies that quantify the amount of PA undertaken by women during pregnancy, postpartum and the postpartum period. The objective of such studies is to establish science-based individualized guidelines for PA for women during this stage of their lives.

## Strengths and limitations

- Pregnancy is a period in a woman's life, characterized by a greater awareness of their health and care.

-An early investment in health protection generally produces long-term benefits in all population groups, including that of pregnant women.

- This project offers benefits that extend beyond those that can occur in life, which also have an impact on clinical practice and the condition of the type of delivery, neonatal outcomes and a better recovery of the pregnant.

-This research will offer new information about how pregnant and postpartum women, like their neonates, respond to moderate physical activity without showing adverse effects.

-The study will offers results on the nutritional behavior of pregnant women, the impact of diet on their newborn and the influence on the mother's puerperium.

## Introduction

When women are pregnant, they take better care of their health and are more receptive and likely to make changes that lead to a healthier lifestyle. Recommendations to increase physical activity (PA) and to eat a healthy diet therefore have a positive effect throughout pregnancy and the postpartum period on the mother as well as their newborn baby (Muktabhant et al., 2015).

The scientific literature contains relevant information on the effects of moderate and regular PA during pregnancy: mothers gain less weight and reduce the risk of pregnancy-related diabetes and hypertension (Muktabhant et al., 2015; Poudevigne et al., 2005); higher stress tolerance and earlier neonatal neuro-behavioural maturity (Clapp et al., 1999). Among other recommendations, the American College of Obstetricians and Gynaecologists (ACOG) suggests that pregnant women with no medical or obstetric complications should perform at least 30 minutes of moderate PA every day of the week (Artal et al., 2003). Nevertheless, the World Health Organization (WHO) admits that further research is needed into guidelines for pregnant women on the amount of PA they should undertake. The WHO currently states that the general considerations for PA in adults also apply to pregnant women, i.e., at least 75 minutes of vigorous PA or 150 minutes of moderate PA per week, including the strengthening of the major muscle groups (WHO, 2010).

On the other hand, several studies on the effects of physical exercise during pregnancy found no relevant benefits for the mother and even detected unsatisfactory results in comparison with other more sedentary mothers (Vallim et al., 2011; Kramer et al., 2006). All these considerations show the need for research to confirm the correct guideline for PA that leads to the greatest health benefits for mothers as well as their newborn babies. As well as being physically active, it is also recommended that women eat a healthy diet during pregnancy and the postpartum period. During this life stage, those women who eat a healthy diet were also found to do more exercise (Olmedo-Requena et al., 2014). Data show that low adherence to the Mediterranean diet may be associated with a reduction in the weight of the placenta and low neonatal weight (Timmermans et al., 2014), as well as the risk of pregnancy-associated diabetes in terms of the classification and diagnosis of diabetes (2015), which indicates how important diet is during this phase of women's lives (Karamanos et al., 2014). Epidemiological studies of pregnant women indicate that their weight prior to pregnancy, height, blood levels of glucose and weight gain during pregnancy are factors that influence foetal development (Restrepo et al., 2009).

While it is important that mothers should not gain excessive weight during pregnancy, they should also return to their pre-pregnancy weight after giving birth. This is because there is an association between the risk of obesity after birth and excessive weight gain during pregnancy (Amorim et al., 2007). On the other hand, controlling weight solely by diet after giving birth is less effective than a combination of diet and physical exercise (Gómez et al., 2016). The promotion of healthy habits in terms of a combination of diet and PA during pregnancy and the postpartum period may therefore be highly beneficial for women.

1  
2  
3 The main outcome of this research is to examine the nutritional habits and the  
4 levels of PA in women during pregnancy and the postpartum period by means of validated  
5 questionnaires and accelerometers.

6  
7 The secondary outcomes are:

8 i) To calculate the relationship between the level of PA and nutritional habits during  
9 pregnancy and the postpartum period in terms of the results for mothers in: weight gain,  
10 the incidence of pregnancy-related diabetes mellitus, pre-eclampsia and pregnancy-  
11 induced hypertension and type of birth. This relationship is also examined in terms of the  
12 results for newborn babies: duration of pregnancy, weight at birth, Apgar score 1 min / 5  
13 min, type of reanimation and umbilical cord blood pH.

14 ii) To identify the factors that influence the performance of PA during each stage of  
15 pregnancy and the postpartum period (using the Spanish version of the Pregnancy  
16 Symptoms Inventory “PSI” and the Edinburgh scale).

## 21 **Methods/Design**

22  
23 A two-year study of cohorts during pregnancy and the postpartum period in Health  
24 Area No. 1, Toledo (Spain).

25  
26 A multicentre study will be undertaken in the healthcare facilities of Castilla -La  
27 Mancha Health Service (SESCAM), in the areas of Primary and Specialised healthcare:  
28 i) Buenavista Health Centre; ii) Santa Bárbara Health Centre; iii) Yepes Health Centre;  
29 iv) Polán Health Centre and v) the Virgen de la Salud Hospital.

30  
31 The sample will be recruited by means of non-probabilistic consecutive sampling  
32 in Primary Care facilities.

### 33 Inclusion criteria:

- 34  
35 i) Women aged from 18 to 40 years old.  
36  
37 ii) Pregnancy having lasted 14 weeks or less.  
38  
39 iii) A single foetus.  
40  
41 iv) Quarterly pregnancy check-ups in Primary Care facilities.  
42  
43 v) The intention of giving birth in the Virgen de la Salud Hospital.  
44  
45 vi) Comprehension of spoken and written Spanish.

### 46 Exclusion criteria:

- 47  
48 i) Women with conditions prior to pregnancy that hinder or limit the practice of PA at the  
49 time of recruitment (one or more contraindications for PA according to the ACOG,  
50 diabetes or arterial hypertension prior to pregnancy, or more than one previous abortion).  
51  
52 ii) Not signing the informed consent document.  
53  
54  
55  
56  
57  
58  
59  
60

1  
2  
3 Iii) Not understanding written and spoken Spanish.  
4

5 Variables  
6

7 *Sociodemographic variables:* the following data will be recorded in the first interview  
8 (*Figure 1*): age (years), marital status (married, single, living with partner, others),  
9 country of origin, educational level (none, primary, secondary, technical college,  
10 university), economic resources (low, medium or high), working status (housewife,  
11 unemployed, in work).  
12  
13

14  
15 *Anthropometrics:* all measurements will be taken by trained investigators to minimize  
16 inter-observer variability, using the same apparatus: scales (mechanical, with a range up  
17 to: max. 220 kg d=50g) and a wall-mounted height gauge (range: 0 to 200 cm). The  
18 subjects will be measured in the 1<sup>st</sup>, 2<sup>nd</sup>, 3<sup>rd</sup> and 4<sup>th</sup> (postpartum) visit in the morning for  
19 weight (without shoes and in light clothing) and height (standing upright without shoes  
20 and with the median sagittal line touching the board) will be measured in the first visit.  
21 The average of two measurements will be taken. Body mass index (BMI) will be  
22 calculated as body mass (in kilograms) divided by height<sup>2</sup> (in metres).  
23  
24

25  
26 *Arterial blood pressure:* will be measured twice, with a 5-min interval between  
27 measurements. The first measurement will be made after at least 5 min rest. Women will  
28 be seated, in relaxing conditions, with the right arm semi-flexed at heart level. Blood  
29 pressure will be measured with an Omron M5-I monitor (Omron Healthcare UK Ltd.).  
30  
31

32 *Physical activity:* PA will be measured using:  
33

34  
35 The Spanish version of the Pregnancy Physical Activity Questionnaire (PPAQ) (Chasan-  
36 Taber et al., 2004). This self-administered questionnaire contains 32 items which measure  
37 the frequency and duration of PA during pregnancy (1<sup>st</sup>, 2<sup>nd</sup> and 3<sup>rd</sup> visit), in terms of:  
38 being sedentary, doing household chores/care, work-related activity and sports activities.  
39

40  
41 Accelerometry will use Actigraph brand GT3X accelerometers to objectively measure  
42 PA levels during the three trimester of pregnancy and during the postpartum period.  
43 Accelerometry has been used in several population groups, including pregnant women,  
44 to quantify PA and relate the data obtained with other factors (Aguilar et al., 2014). The  
45 criteria for the inclusion of data in the analysis of results will be a minimum recording of  
46 4 days, including at least three weekdays and one weekend day, with imperceptible  
47 recording of 600 minutes per day (Trost et al., 2005). The device will be worn on an  
48 elastic strap on the wrist of the non-dominant hand during seven consecutive days and  
49 nights, except for bathing and performing activities in the water, in each one of the  
50 measurements (*Figure 1*). The data gathering interval in this study will last for 60 seconds  
51 (epochs), as this has been shown to be valid for measuring PA in adults. The  
52 accelerometer will also supply information on posture, sleep latency, total sleep time,  
53 sleep efficiency, the intensity of PA, periods of activity, periods of sedentary behaviour,  
54 rhythm intervals, gross acceleration, energy consumption, MET ratios and the number of  
55  
56  
57  
58  
59  
60

1  
2  
3 steps (Chen et al., 2005). All subjects will be verbally and in writing instructed on how  
4 to use the accelerometer. Data will be downloaded using Actilife v6. 13. 3 software.  
5

6  
7 To identify the factors which influence carrying out PA the Spanish version of the  
8 Pregnancy Symptoms Inventory (PSI) will be used (Foxcroft et al., 2013) during  
9 pregnancy, while the Edinburg depression scale will be used in the postpartum period  
10 (Vega-Dienstmaier et al., 2002). The PSI is a self-administered questionnaire that  
11 evaluates the frequency and degree of limitation of everyday activities arising due to  
12 different causes (not at all, a little, a lot) involving 41 intrinsic symptoms of pregnancy.  
13 The Edinburgh scale consists of 10 questions with four possible replies, of which the  
14 subjects must choose one based on how they felt over the past seven days. Although the  
15 final score will indicate the probability of post-natal depression, it will not vary according  
16 to its severity.  
17  
18  
19

20  
21 *Variables associated with nutritional habits:* the “Young Adolescents’ Nutrition  
22 Assessment on Computer” (YANA-C) (Vereecken et al., 2005) will be used, together  
23 with the Mediterranean diet adherence questionnaire (PREDIMED) (Martínez-González  
24 et al., 2012) to gather data on the diet of pregnant and postpartum women. YANA-C  
25 consists of listing the foods consumed in the previous 24 hours, and it is divided into  
26 breakfast, mid-morning, lunch, tea, dinner and after dinner. PREDIMED is a self-  
27 administered questionnaire containing 14 questions that are answered by a score showing  
28 low (< 9 points) or good adherence to the Mediterranean diet (> 9 points).  
29  
30  
31

32 *Pregnancy data:* duration of pregnancy (weeks and days of amenorrhea, according to the  
33 date of the last period and confirmation by ultrasound scan), medical problems during  
34 pregnancy (Yes/No). The possibility of a premature birth, arterial hypertension,  
35 gestational diabetes (defined according to the criteria of the American Diabetes  
36 Association (ADA) (2015)), retarded intrauterine growth and a reduction in amniotic  
37 fluid, among others).  
38  
39

40  
41 *Birth data:* type of analgesia during birth (none, epidural, spinal), onset of birth  
42 (spontaneous / induced, reason for induction), duration of pregnancy (weeks and days),  
43 type of birth (natural, instrumental, caesarean), reasons for an instrumental or caesarean  
44 birth, episiotomy (yes/no), perineal tear (yes/no, grade I/II/III/IV), type of birth  
45 (spontaneous, manual, directed), duration of dilation (minutes), duration of expulsion  
46 (minutes).  
47  
48

49  
50 *Neonatal data:* weight (grams), sex (male/female), 1/5 minutes APGAR scale score, type  
51 of reanimation (I/II/III/IV), umbilical cord blood pH (arterial and venous), foetal calotte  
52 pH (if performed), cord pinching (early/late), commencement of breast feeding in the first  
53 two hours of life (yes/no).  
54

55  
56 *Postpartum data:* bleeding (physiological/moderate/severe), condition of perineum  
57 (haematoma/oedema/pain/haemorrhoids/suture dehiscence) and postpartum  
58 complications.  
59  
60



1  
2  
3 Data corresponding to pregnancy, birth, the newborn baby and postpartum period will be  
4 obtained from the clinical history of the mother.  
5

#### 6 Patient and public involvement 7

8 There was no patient or public involvement in the design of this protocol.  
9

#### 10 Statistical analysis 11

12  
13 Regression models will be used to examine the relationship between dependent  
14 variables and patient health, measured using one or more explanatory variables that  
15 express exposure to a risk factor.  
16

17 Sample size has been calculated using *Epidat 4.1*, with an exposed/non-exposed  
18 ratio of 1. A prevalence of 14% is assumed in the group of exposed (sedentary) women  
19 and a prevalence of 3% is assumed in the group of non-exposed women (who are active  
20 according to the current criteria of the American College of Sports Medicine- 30  
21 minutes/day of moderately intense (80%) PA every day or almost every day,  
22 accumulating at least 150 min/week). Approximately 5% should be added to these  
23 premises to account for possible non-responders (women who do not wish to take part in  
24 the study).  
25  
26  
27  
28

#### 29 **Discussion** 30

31 The study results will make it possible to better advise pregnant women about  
32 recommendable PA and nutrition. They will also make it possible to update health  
33 education programs for this population group, leading to many benefits for mothers as  
34 well as their children.  
35  
36

37 Adherence to an exercise routine is influenced by factors such as: the habit of  
38 exercising prior to pregnancy, sociocultural level, equality and the insistence by  
39 healthcare workers that pregnant women undertake PA. The study by Nascimento et al.  
40 (2015) showed that half of the women taking part ceased doing physical activity during  
41 pregnancy  
42  
43  
44

45 It is therefore important that healthcare personnel offer information on the risks  
46 and benefits of PA, while also setting personalised guidelines adapted to the specific  
47 needs of each woman. All of the information supplied to future mothers must therefore  
48 be supported by scientific evidence. The aim is to guide future mothers towards a healthy  
49 lifestyle and to change their habits. This is not only to prevent pathologies during  
50 pregnancy and the postpartum period, but rather to ensure that their new habits last  
51 throughout their life.  
52  
53  
54

55 The study will also record biochemical parameters which, in association with the  
56 data gathered using the scales and accelerometer, will make it possible to prevent the risk  
57 of non-transmissible diseases during pregnancy and the postpartum period. Biochemical  
58 changes are closely linked to the amount of mothers' PA and the quality and type of their  
59  
60

1  
2  
3 diet during pregnancy and the postpartum period. An example of this relationship is the  
4 use of the biochemical parameter of glucose as a gestational diabetes marker. Pérez-Ferre  
5 et al. (2015) intervened in a group of women with gestational diabetes, changing their  
6 dietary habits and encouraging physical exercise. They found that the risk of developing  
7 type 2 diabetes in the future fell in the intervention group in comparison with the control  
8 group (Perez-Ferre et al., 2015).  
9

10  
11  
12 Larger studies are therefore necessary which quantify the PA of women during  
13 pregnancy and the postpartum period, to set guidelines based on scientific evidence.  
14 Accelerometers supply reliable and exact data, and they may be considered to be a  
15 motivating factor in maternal education programs, as they make pregnant women aware  
16 of the amount of PA they perform, thereby stimulating the regular practice of PA.  
17  
18

### 19 20 **Abbreviations:**

21  
22 PA, Physical Activity; ACOG, American College of Obstetricians and Gynaecologists;  
23 WHO, World Health Organization; PSI, Pregnancy Symptoms Inventory; SESCAM,  
24 Castilla -La Mancha Health Service; THC, Toledo Hospital Complex; BMI, Body mass  
25 index; PPAQ, Pregnancy Physical Activity Questionnaire; PSI, Pregnancy Symptoms  
26 Inventory; YANA-C, Young Adolescents' Nutrition Assessment on Computer;  
27 PREDIMED, Mediterranean diet adherence questionnaire; ADA, American Diabetes  
28 Association.  
29  
30  
31

### 32 **Declarations:**

#### 33 34 a. Ethics and Dissemination

35  
36  
37 This research project has been approved by the Toledo Hospital Complex (THC)  
38 Clinical Research Ethics Committee, approval number 125. It has also been approved by  
39 the Primary and Specialised Care Nursing Boards for implementation and development.  
40

41  
42 Before they sign the consent document to take part in the study, all the participants  
43 will be informed verbally and in writing about the study procedure as well as its  
44 objectives. Data confidentiality will be guaranteed, and it will also be possible for  
45 participants to revoke their consent for the study at any stage of the same.  
46

47  
48 Study outcomes will be disseminated at international conferences and published  
49 in peer-reviewed scientific journals.  
50

#### 51 52 b. Consent for publication

53  
54 Not applicable

#### 55 56 c. Availability of data and material

57  
58 The data supporting our findings are contained within the manuscript.  
59  
60

1  
2  
3 d. Conflicts of interests  
4

5 The authors declare that they have no competing interests and they have no commercial  
6 or public commitments that would prevent them from undertaking this research.  
7

8  
9 e. Funding

10 This research did not receive any specific grant from funding agencies in the public,  
11 commercial, or not-for-profit sectors.  
12  
13

14 f. Author Statement

15  
16 Conceived and designed the experiments: AMM, MMDA, MVA, SGC and NAP., JLGP,  
17 BGL, BMG, SGC and NAP gave statistical and epidemiological support. Contributed  
18 reagents/ materials/analysis tools: AMM, MMDA, MVA, BGL, BMG. Wrote the paper:  
19 AMM, SGC and NAP. All authors established the methods and questionnaires, provided  
20 comments on the drafts, and read and approved the final version.  
21  
22

23  
24 g. Acknowledgements

25  
26 We thank the healthcare facilities of Castilla -La Mancha Health Service (SESCAM), in  
27 the areas of Primary and Specialised healthcare: i) Buenavista Health Centre; ii) Santa  
28 Bárbara Health Centre; iii) Yepes Health Centre; iv) Polán Health Centre and v) the  
29 Virgen de la Salud Hospital, that have shown their interest in participating in our study.  
30  
31

32  
33  
34 **References**  
35

36  
37 Aguilar, M.J., Sanchez, A.M., Guisado, R., Rodriguez, R., Noack, J., Pozo, M.D., 2014.  
38 [Accelerometer description as a method to assess physical activity in different periods of  
39 life; systematic review]. *NutrHosp.* 29(6):1250-61.  
40  
41

42 American Diabetes Association, 2015. Classification and diagnosis of diabetes. *Diabetes*  
43 *Care.* 38(Suppl 1): S8–S16.  
44

45  
46 Amorim, A.R., Linne, Y.M., Lourenco, P.M., 2007. Diet or exercise, or both, for weight  
47 reduction in women after childbirth. *Cochrane DatabaseSyst Rev.* (3): Cd005627.  
48

49 Amorim, A.R., Rossner, S., Neovius, M., Lourenco, P.M., Linne, Y., 2007. Does excess  
50 pregnancy weight gain constitute a major risk for increasing long-term BMI? *Obesity*  
51 *(Silver Spring).* 15(5):1278-86.  
52  
53

54 Artal, R., O'Toole, M., 2003. Exercise during pregnancy and the postpartum period.  
55 *Clinical Obstet Gynecol.*; 46(2):496  
56  
57  
58  
59  
60

1  
2  
3 Chasan-Taber, L., Schmidt, M.D., Roberts, D.E., Hosmer, D., Markenson, G., Freedson,  
4 P.S., 2004. Development and validation of a pregnancy physical activity questionnaire.  
5 *Med Sci Sports Exerc.* 36(10):1750–60.  
6

7  
8 Chen, K.Y., Bassett, D.R., 2005. The technology of accelerometry-based activity  
9 monitors: current and future. *Med Sci Sports Exerc.* 37(11):S490.  
10

11 Clapp, J.F., Lopez, B., Harcar-Sevcik, R., 1999. Neonatal behavioral profile of the  
12 offspring of women who continued to exercise regularly throughout pregnancy. *Am J*  
13 *ObstetGynecol*; 180(1):91-4.  
14

15  
16 Foxcroft, K.F., Callaway, L.K., Byrne, N.M., Webster, J. 2013. Development and  
17 validation of a pregnancy symptoms inventory. *BMC Pregnancy Childbirth.* 13:3.  
18

19  
20 Freedson, P.S., Melanson, E., Sirard, J., 1998. Calibration of the Computer Science and  
21 applications. Inc. accelerometer. *Med Sci Sports Exerc.* 30(5):777–81.  
22

23 Gómez, S., et al., 2016. Vivencias, experiencias y diferencias sexuales: mujer puérpera  
24 española e inmigrante. Área sanitaria Palma de Mallorca (España). *Rev. Enf. Ref.*  
25 [online]. Vol.serIV, n.9, pp.115-123. ISSN 0874-0283.  
26

27  
28 Karamanos, B., Thanopoulou, A., Anastasiou, E., et al., 2014. Relation of the  
29 Mediterranean diet with the incidence of gestational diabetes. *Eur J Clin Nutr.* 68(1):8-13.  
30

31  
32 Kramer MS McDonald SW. Aerobic exercise for women during pregnancy. *Cochrane*  
33 *Database Syst Rev* 2006; 2:CD000180.  
34

35 Magann, E.F., Evans, S.F., Weitz, B., Newnham, J., 2002. Antepartum, intrapartum, and  
36 neonatal significance of exercise on healthy low-risk pregnant working women.  
37 *ObstetGynecol.* 99(3):466-72.  
38

39  
40 Martínez-González, M.A., Corella, D., Salas-Salvadó, J., Ros, E., Covas, M.I., Fiol, M.,  
41 Wärnberg, J., Arós, F., Ruíz-Gutiérrez, V., Lamuela-Raventós, R.M., Lapetra, J., Muñoz,  
42 M.A., Martínez, J.A., Sáez, G., Serra-Majem, L., Pintó, X., Mitjavila, M.T., Tur, J.A.,  
43 Portillo, M.P., Estruch, R., 2012. Cohort profile: design and methods of the predimed  
44 study. *Int J Epidemiol.* 41:377-85.  
45

46  
47 Muktabhant, B., Lawrie, T.A., Lumbiganon, P., Laopaiboon, M., 2015. Diet or exercise,  
48 or both, for preventing excessive weight gain in pregnancy. *Cochrane Database Syst Rev.*  
49 (6): Cd007145.  
50

51  
52 Nascimento, S.L., Surita, F.G., Godoy, A.C., Kasawara, K.T., Morais, S.S., 2015.  
53 Physical activity patterns and factors related to exercise during pregnancy: a cross  
54 sectional study. *PLoSOne.* 10(6): e0128953.  
55

56  
57 Olmedo-Requena, R., Fernandez, J.G., Prieto, C.A., Moreno, J.M., Bueno-Cavanillas, A.,  
58 Jimenez-Moleon, J.J., 2014. Factors associated with a low adherence to a Mediterranean  
59  
60

1  
2  
3 diet pattern in healthy Spanish women before pregnancy. *PublicHealthNutr.* 17(3):648-  
4 56.

6 Perez-Ferre, N., Del Valle, L., Torrejon, M.J., Barca, I., Calvo, M.I., Matia, P., et al.,  
7 2015. Diabetes mellitus and abnormal glucose tolerance development after gestational  
8 diabetes: A three-year, prospective, randomized, clinical-based, Mediterranean lifestyle  
9 interventional study with parallel groups. *ClinNutr.* 34(4):579-85.

12 Poudevigne, M.S., O'Connor, P.J.,2005. Physical activity and mood during pregnancy.  
13 *MedSci Sports Exerc* (8); 37:1374-80.

16 Restrepo, S., Parra, B., 2009. Implicaciones del estado nutricional materno en el peso al  
17 nacer del neonato. *Perspectivas en nutrición humana.* 11(2):179-186

19 Sanabria-Martinez, G., Garcia-Hermoso, A., Poyatos-Leon, R., Alvarez-Bueno. C.,  
20 Sanchez-Lopez, M., Martinez-Vizcaino, V.,2015. Effectiveness of physical activity  
21 interventions on preventing gestational diabetes mellitus and excessive maternal weight  
22 gain: a meta-analysis. *Bjog.*122(9):1167-1174.

25 Timmermans, S., Steegers-Theunissen, R.P., Vujkovic, M., et al, 2012. The  
26 Mediterranean diet and fetal size parameters: the Generation R Study. *Br J Nutr.*  
27 108(8):1399-1409.

30 Trost, S.G., K.L. McIver, and R.R. Pate, Conducting accelerometer-based activity  
31 assessments in field-based research. *Med Sci Sports Exerc*, 2005. 37(11 Suppl): p. S531-  
32 43.

35 Vallim, A.L., Osis, M.J., Cecatti, J.G., Baciuk, E.P., Silveira, C., Cavalcante, S.R, 2011.  
36 Water exercises and quality of life during pregnancy. *ReprodHealth.* 8:14

39 Vega-Dienstmaier, J.M., Mazzotti, G., Campos, M., 2002. Validación de una versión en  
40 español de la escala de depresión postnatal de Edimburgo. *ActasEspPsiquitr.* 30 (2): 106-  
41 111.

44 Vereecken, C.A., Covents, M., Matthys, C., Maes, L.,2005. Young adolescents' nutrition  
45 assessment on computer (YANA-C). *Eur J ClinNutr.* 59(5):658-67.

48 WHO, 2010. WHO Guidelines Approved by the Guidelines Review Committee. Global  
49 Recommendations on Physical Activity for Health. Geneva: World Health Organization.

## 51 **Figure Legends**

52 Fig. 1. Data gathering phases. AP, arterial blood pressure; BMI, body mass index.  
53  
54  
55  
56  
57  
58  
59  
60

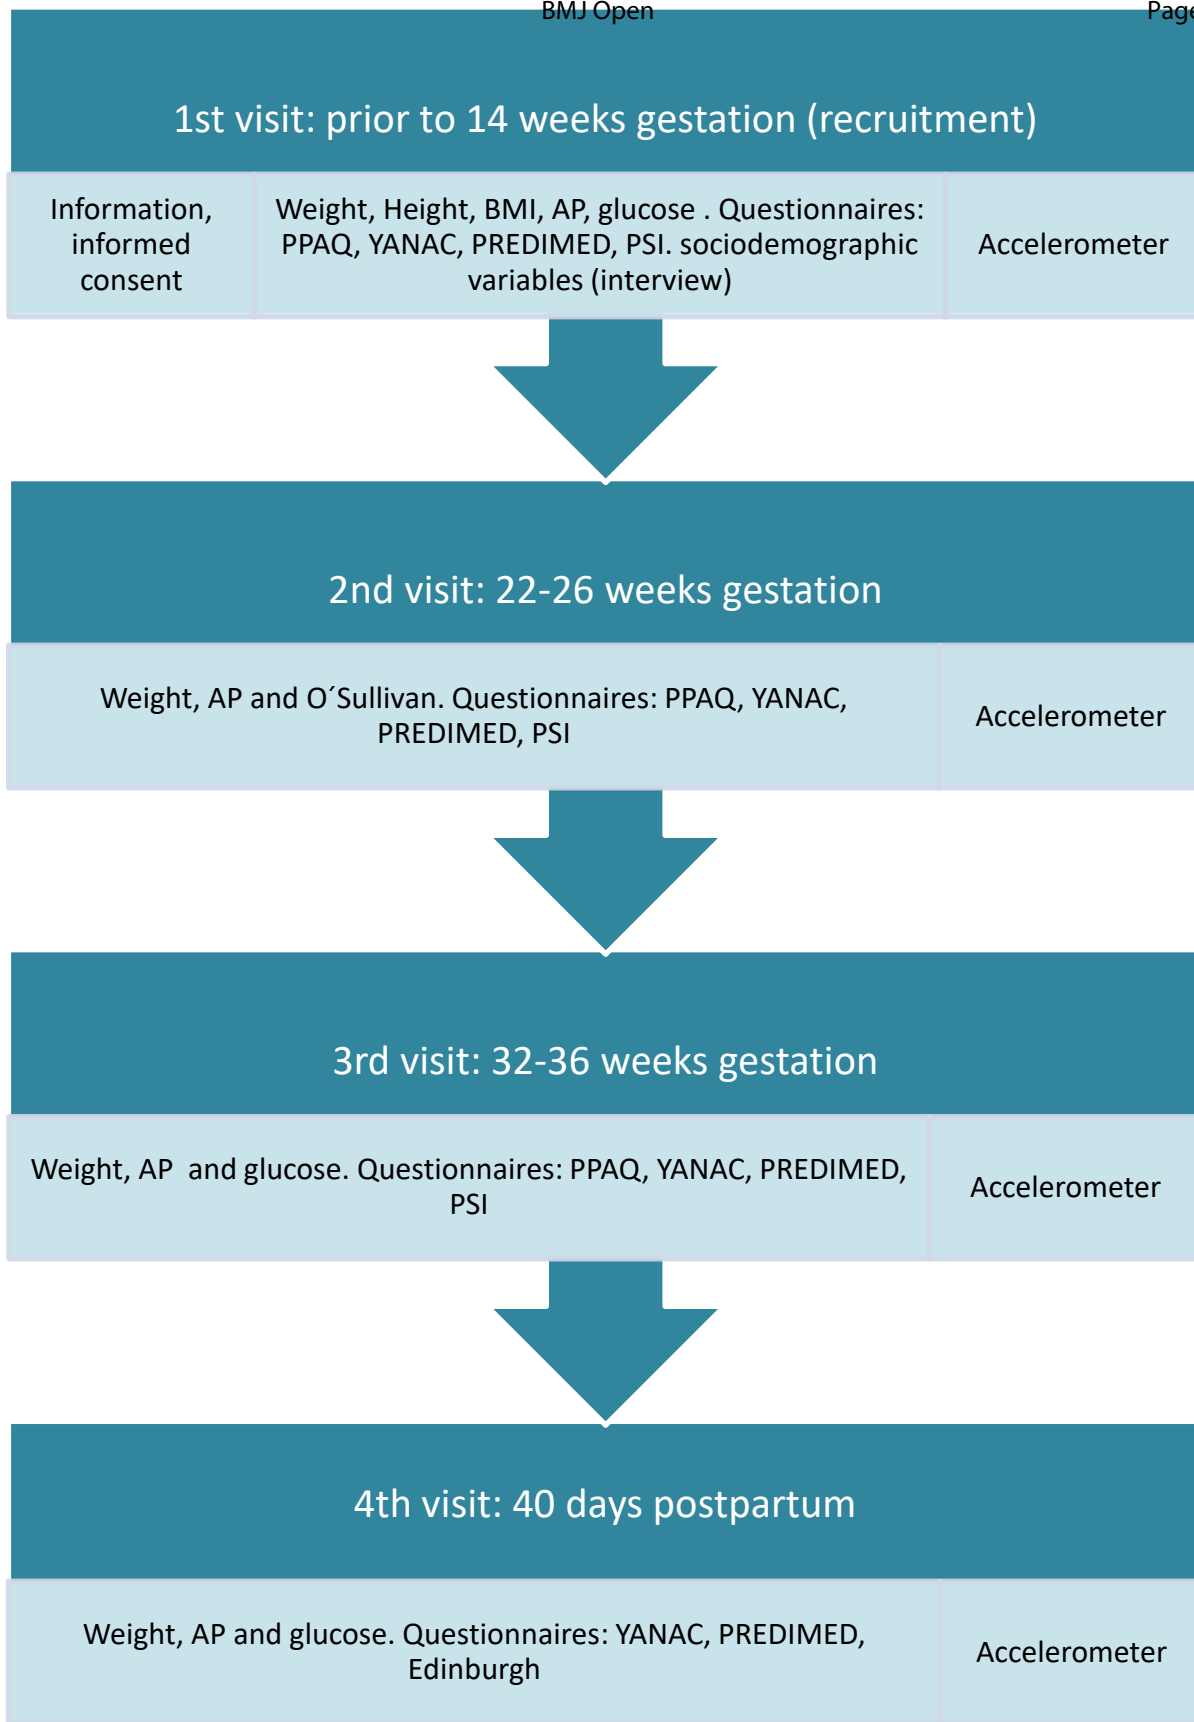

Fig. 1. Data gathering phases. AP, arterial blood pressure; BMI, body mass index.

1  
2  
3  
4  
5  
6  
7  
8  
9  
10  
11  
12  
13  
14  
15  
16  
17  
18  
19  
20  
21  
22  
23  
24  
25  
26  
27  
28  
29  
30  
31  
32  
33  
34  
35  
36  
37  
38  
39  
40  
41  
42  
43  
44  
45  
46  
47  
48  
49  
50  
51  
52  
53  
54  
55  
56

# BMJ Open

## Analysis of nutritional habits and levels of physical activity during pregnancy, birth and the postpartum period of women in health area no. 1, Toledo (Spain). The PrePaN study protocol.

|                                 |                                                                                                                                                                                                                                                                                                                                                                                                                                                                                                                                                                                                                                                                                                                                                                                                                                                                                                                                                                                                                                                                                                                                                                                                                                                                                                                                                                                                |
|---------------------------------|------------------------------------------------------------------------------------------------------------------------------------------------------------------------------------------------------------------------------------------------------------------------------------------------------------------------------------------------------------------------------------------------------------------------------------------------------------------------------------------------------------------------------------------------------------------------------------------------------------------------------------------------------------------------------------------------------------------------------------------------------------------------------------------------------------------------------------------------------------------------------------------------------------------------------------------------------------------------------------------------------------------------------------------------------------------------------------------------------------------------------------------------------------------------------------------------------------------------------------------------------------------------------------------------------------------------------------------------------------------------------------------------|
| Journal:                        | <i>BMJ Open</i>                                                                                                                                                                                                                                                                                                                                                                                                                                                                                                                                                                                                                                                                                                                                                                                                                                                                                                                                                                                                                                                                                                                                                                                                                                                                                                                                                                                |
| Manuscript ID                   | bmjopen-2019-029487.R1                                                                                                                                                                                                                                                                                                                                                                                                                                                                                                                                                                                                                                                                                                                                                                                                                                                                                                                                                                                                                                                                                                                                                                                                                                                                                                                                                                         |
| Article Type:                   | Protocol                                                                                                                                                                                                                                                                                                                                                                                                                                                                                                                                                                                                                                                                                                                                                                                                                                                                                                                                                                                                                                                                                                                                                                                                                                                                                                                                                                                       |
| Date Submitted by the Author:   | 09-May-2019                                                                                                                                                                                                                                                                                                                                                                                                                                                                                                                                                                                                                                                                                                                                                                                                                                                                                                                                                                                                                                                                                                                                                                                                                                                                                                                                                                                    |
| Complete List of Authors:       | Muñoz Muñoz, Aránzazu; Universidad de Castilla-La Mancha - Campus de Toledo, Nursing, Physiotherapy and Occupational Therapy Department; Buenavista Primary Care Centre, SESCAM.<br>Cantarino, Sagrario; Universidad de Castilla-La Mancha - Campus de Toledo, Nursing, Physiotherapy and Occupational Therapy Department, De Dios Aguado, María de las Mercedes; Universidad de Castilla-La Mancha - Campus de Toledo, Nursing, Physiotherapy and Occupational Therapy Department;; Yepes Primary Care Centre<br>Velasco Abellán, Minerva; Universidad de Castilla-La Mancha - Campus de Toledo, Nursing, Physiotherapy and Occupational Therapy Department;; Department of Emergency. Castilla-La Mancha Health System<br>González López, Beatriz; Universidad de Castilla-La Mancha - Campus de Toledo, Nursing, Physiotherapy and Occupational Therapy Department;; Polan Primary Care Centre<br>Molina Gallego, Brigida; Universidad de Castilla-La Mancha - Campus de Toledo, Nursing, Physiotherapy and Occupational Therapy Department;; FENNSI Group, Hospital Nacional de Paraplégicos<br>González Pascual, Juan Luis; Universidad Europea de Madrid, School of Biomedical and Health Sciences; Nursing Department.<br>Arias Palencia, Natalia María; Universidad de Castilla- La Mancha, School of Education; Universidad de castilla- La Mancha, Health and Social Research Center |
| <b>Primary Subject Heading</b>: | Obstetrics and gynaecology                                                                                                                                                                                                                                                                                                                                                                                                                                                                                                                                                                                                                                                                                                                                                                                                                                                                                                                                                                                                                                                                                                                                                                                                                                                                                                                                                                     |
| Secondary Subject Heading:      | Obstetrics and gynaecology                                                                                                                                                                                                                                                                                                                                                                                                                                                                                                                                                                                                                                                                                                                                                                                                                                                                                                                                                                                                                                                                                                                                                                                                                                                                                                                                                                     |
| Keywords:                       | accelerometer, pregnancy outcomes, physical activity, neonatal outcomes                                                                                                                                                                                                                                                                                                                                                                                                                                                                                                                                                                                                                                                                                                                                                                                                                                                                                                                                                                                                                                                                                                                                                                                                                                                                                                                        |
|                                 |                                                                                                                                                                                                                                                                                                                                                                                                                                                                                                                                                                                                                                                                                                                                                                                                                                                                                                                                                                                                                                                                                                                                                                                                                                                                                                                                                                                                |

SCHOLARONE™  
Manuscripts

1  
2  
3  
4  
5  
6  
7  
8  
9  
10  
11  
12  
13  
14  
15  
16  
17  
18  
19  
20  
21  
22  
23  
24  
25  
26  
27  
28  
29  
30  
31  
32  
33  
34  
35  
36  
37  
38  
39  
40  
41  
42  
43  
44  
45  
46  
47  
48  
49  
50  
51  
52  
53  
54  
55  
56  
57  
58  
59  
60



1  
2  
3 **Analysis of nutritional habits and levels of physical activity during pregnancy, birth**  
4 **and the postpartum period of women in health area no. 1, Toledo (Spain). The**  
5 **PrePaN study protocol.**  
6  
7

8 Muñoz Muñoz, Aránzazu <sup>1,2</sup>; Gómez Cantarino, Sagrario<sup>1</sup>; De Dios Aguado, María De  
9 Las Mercedes <sup>1,3</sup>; Velasco Abellán, Minerva <sup>1,4</sup>; González López, Beatriz <sup>1,5</sup>; Molina  
10 Gallego, Brígida <sup>1,6</sup>; González Pascual, Juan Luis <sup>7</sup>; Arias Palencia, Natalia María <sup>8,9</sup>.  
11  
12

13  
14 1- ENDOCU Group, University School of Nursing and Physiotherapy Toledo (Nursing,  
15 pain and Care), Toledo, Spain.

16 2- Buenavista Primary Care Centre, SESCAM, Toledo, Spain.

17 3- Yepes Primary Centre, SESCAM, Toledo, Spain.

18 4- Department of Emergency. Castilla-La Mancha Health System, Toledo, Spain.

19 5- Polan Primary Care Centre, SESCAM, Toledo, Spain

20 6- FENNSI Group, Hospital Nacional de Paraplégicos, SESCAM, Toledo, Spain.

21 7- School of Biomedical and Health Sciences; Nursing Department. Universidad Europea  
22 de Madrid, Madrid, Spain.

23 8- School of Education, Universidad de Castilla-La Mancha, Cuenca, Spain.

24 9- Health and Social Research Center, Universidad de Castilla-La Mancha, Cuenca,  
25 Spain.  
26  
27

28  
29  
30  
31 E-mails authors:

32 [ara\\_mnz@hotmail.com](mailto:ara_mnz@hotmail.com)

33 [Sagrario.gomez@uclm.es](mailto:Sagrario.gomez@uclm.es)

34 [mded@sescam.jccm.es](mailto:mded@sescam.jccm.es)

35 [minerva.velasco@uclm.es](mailto:minerva.velasco@uclm.es)

36 [begolo@sescam.jccm.es](mailto:begolo@sescam.jccm.es)

37 [Brigida.molina@uclm.es](mailto:Brigida.molina@uclm.es)

38 [juanluis.gonzalez2@universidadeuropea.es](mailto:juanluis.gonzalez2@universidadeuropea.es)

39 [Natalia.arias@uclm.es](mailto:Natalia.arias@uclm.es)  
40  
41  
42  
43

44 Corresponding author:

45 Sagrario Gómez Cantarino. Department of Nursing, Physiotherapy and occupational  
46 therapy. School of Nursing and Physiotherapy Toledo, University of Castilla- La Mancha,  
47 Toledo, Spain.

48 Avd/ Carlos III s/n, 45071, Toledo, Spain.

49 [Sagrario.gomez@uclm.es](mailto:Sagrario.gomez@uclm.es)

50 +34670225048  
51  
52  
53  
54  
55

56 **Key words:** accelerometer, neonatal outcomes, physical activity, pregnancy outcomes.

57 **Word count:** 2787  
58  
59  
60

## Abstract

Introduction: Pregnant women who eat a balanced diet usually practice physical activity (PA) regularly; there are many studies on PA during pregnancy and the results for the mother and baby. However, the guideline for PA during pregnancy is very general and is not quantified. The primary objective is to examine the nutritional habits and levels of PA of women during pregnancy and the postpartum period using validated questionnaires and accelerometers. Secondly, it will determine the effects of these aspects on the mother and newborn baby. Its third objective is to identify the factors which influence the practice of PA during this phase.

Methods and analysis: This is a prospective cohort study lasting two years. From September 2018 to September 2020. The sample will be recruited in three Primary Care centers in the Toledo (Spain) health area. The participants will be pregnant women aged from 18 to 40 years old who should attend all the check-ups during their pregnancy and the postpartum period. PA will be quantified using an accelerometer, while nutritional habits and physical exercise will be evaluated using validated questionnaires. The symptoms of pregnancy and the postpartum period will be recorded, together with biochemical parameters and anthropometric data. The primary outcomes will be determined in the pregnant women: weight gain, the incidence of gestational diabetes mellitus, pre-eclampsia and pregnancy-induced hypertension. Secondary outcomes include duration of pregnancy and weight at birth, Apgar score (1 min/ 5 min), type of reanimation (I/II/III/IV), and umbilical cord blood pH in the newborn babies.

Discussion: although the beneficial effects of PA during pregnancy are known, there is a need to perform studies that quantify the amount of PA undertaken by women during pregnancy and the postpartum period. The objective of such studies is to establish science-based individualized guidelines for PA for women during this time

## Strengths and limitations

-This research will offer new information about how pregnant and postpartum women, like their neonates, respond to moderate physical activity without showing adverse effects.

-The study will offer new information about nutritional behavior of pregnant women, the impact of diet on their newborn and the influence on the mother's puerperium.

The Yana- C questionnaire has not been validated in pregnant women.

To control for the limitation mentioned above we will use a self-administered questionnaire about good adhesion to the Mediterranean diet (PREDIMED). Also, we will validate the Yana-C questionnaire in pregnant women.

## Introduction

When women are pregnant, they take better care of their health and are more receptive and likely to make changes that lead to a healthier lifestyle. Recommendations to increase physical activity (PA) and to eat a healthy diet therefore have a positive effect

1  
2  
3 throughout pregnancy and the postpartum period on the mother as well as their newborn  
4 baby [1].

5  
6 The scientific literature contains relevant information on the effects of moderate  
7 and regular PA during pregnancy: mothers gain less weight and reduce the risk of  
8 pregnancy-related diabetes, pre-eclampsia and hypertension [1,2]; higher stress tolerance  
9 and earlier neonatal neuro-behavioural maturity [3]. Among other recommendations, the  
10 American College of Obstetricians and Gynaecologists (ACOG) suggests that pregnant  
11 women with no medical or obstetric complications should perform at least 30 minutes of  
12 moderate PA every day of the week [4]. Nevertheless, the World Health Organization  
13 (WHO) admits that further research is needed into guidelines for pregnant women on the  
14 amount of PA they should undertake. The WHO currently states that the general  
15 considerations for PA in adults also apply to pregnant women, i.e., at least 75 minutes of  
16 vigorous PA or 150 minutes of moderate PA per week, including the strengthening of the  
17 major muscle groups [5].

18  
19 On the other hand, several studies on the effects of physical exercise during pregnancy  
20 found no relevant benefits for the mother and even detected unsatisfactory results in  
21 comparison with other more sedentary mothers [6,7]. All these considerations show the  
22 need for research to confirm the correct guideline for PA that leads to the greatest health  
23 benefits for mothers as well as their newborn babies.

24  
25 As well as being physically active, it is also recommended that women eat a healthy diet  
26 during pregnancy and the postpartum period. During this life stage, those women who eat  
27 a healthy diet were also found to do more exercise [8]. Data show that low adherence to  
28 the Mediterranean diet may be associated with a reduction in the weight of the placenta  
29 and low neonatal weight[9,10], as well as the risk of pregnancy-associated diabetes in  
30 terms of the classification and diagnosis of diabetes [11], which indicates how important  
31 diet is during this phase of women's lives[12]. Epidemiological studies of pregnant  
32 women indicate that their weight prior to pregnancy, height, blood levels of glucose and  
33 weight gain during pregnancy are factors that influence fetal development [10].

34  
35 While it is important that mothers should not gain excessive weight during  
36 pregnancy, they should also return to their pre-pregnancy weight after giving birth. This  
37 is because there is an association between the risk of obesity after birth and excessive  
38 weight gain during pregnancy[13]. On the other hand, controlling weight solely by diet  
39 after giving birth is less effective than a combination of diet and physical exercise[14].  
40 The promotion of healthy habits in terms of a combination of diet and PA during  
41 pregnancy and the postpartum period may therefore be highly beneficial for women[15].

42  
43 The main objective of this research are to examine independently the nutritional  
44 habits and the levels of PA in women during pregnancy and the postpartum period by  
45 means of validated questionnaires and accelerometers.

46  
47 The secondary objectives are:

48  
49 i) To calculate the relationship between the level of PA and nutritional habits during  
50 pregnancy and the postpartum period in terms of the results for mothers in: weight gain,  
51 the incidence of pregnancy-related diabetes mellitus, pre-eclampsia and pregnancy-  
52 induced hypertension and type of birth. This relationship is also examined in terms of the  
53  
54  
55  
56  
57  
58  
59  
60

1  
2  
3 results for newborn babies: duration of pregnancy, weight at birth, Apgar score 1 min / 5  
4 min, type of reanimation and umbilical cord blood pH.

5  
6 ii) To identify the factors that influence the performance of PA during each stage of  
7 pregnancy and the postpartum period (using the Spanish version of the Pregnancy  
8 Symptoms Inventory “PSI” and the Edinburgh scale).  
9

## 10 11 **Methods/Design**

12  
13 A two-year study of cohorts during pregnancy and the postpartum period in Health  
14 Area No. 1, Toledo (Spain).  
15

16  
17 A multicentre study will be undertaken in the healthcare facilities of Castilla -La  
18 Mancha Health Service (SESCAM), in the areas of Primary and Specialised healthcare:  
19 i) Buenavista Health Centre; ii) Santa Bárbara Health Centre; iii) Yepes Health Centre;  
20 iv) Polán Health Centre and v) the Virgen de la Salud Hospital.  
21

22  
23 The sample will be recruited by matrons by means of non-probabilistic  
24 consecutive sampling in Primary Care facilities.  
25

26  
27 Study recruitment started on 01 September 2018 and the study is expected to last  
28 until September 2020.  
29

### 30 Inclusion criteria:

- 31  
32 i) Women aged from 18 to 40 years old.  
33  
34 ii) Pregnancy having lasted 14 weeks or less.  
35  
36 iii) A single foetus.  
37  
38 iv) Quarterly pregnancy check-ups in Primary Care facilities.  
39  
40 v) The intention of giving birth in the Virgen de la Salud Hospital.  
41  
42 vi) Comprehension of spoken and written Spanish.  
43  
44

### 45 Exclusion criteria:

- 46  
47 i) Women with conditions prior to pregnancy that hinder or limit the practice of PA at the  
48 time of recruitment (one or more contraindications for PA according to the ACOG,  
49 diabetes or arterial hypertension prior to pregnancy, or more than one previous abortion).  
50  
51 ii) Not signing the informed consent document.  
52  
53 iii) Not understanding written and spoken Spanish.  
54  
55 iv) Women who do not complete the follow-up.  
56  
57

### 58 Variables (Figure 1):

59  
60

1  
2  
3 *Sociodemographic variables:* the following data will be recorded in the first interview  
4 age (years), marital status (married, single, living with partner, others), country of origin,  
5 educational level (none, primary, secondary, technical college, university), economic  
6 resources (low, medium or high), working status (housewife, unemployed, in work).  
7  
8

9 *Anthropometrics:* all measurements will be taken by trained investigators to minimize  
10 inter-observer variability, using the same apparatus: scales (mechanical, with a range up  
11 to: max. 220 kg d=50g) and a wall-mounted height gauge (range: 0 to 200 cm). The  
12 subjects will be measured in the 1<sup>st</sup>, 2<sup>nd</sup>, 3<sup>rd</sup> and 4<sup>th</sup> (postpartum) visit in the morning for  
13 weight (without shoes and in light clothing) and height (standing upright without shoes  
14 and with the median sagittal line touching the board) will be measured in the first visit.  
15 The average of two measurements will be taken. Body mass index (BMI) will be  
16 calculated as body mass (in kilograms) divided by height<sup>2</sup> (in metres).  
17  
18  
19

20 *Arterial blood pressure:* will be measured twice, with a 5-min interval between  
21 measurements. The first measurement will be made after at least 5 min rest. Women will  
22 be seated, in relaxing conditions, with the right arm semi-flexed at heart level. Blood  
23 pressure will be measured with an Omron M5-I monitor (Omron Healthcare UK Ltd.).  
24  
25

26 *Biochemical parameters:*

27  
28  
29 Study data will be collected by trained research staff. All blood samples will be taken  
30 from the right or left cubital fossa, after an 8–12 h fast, between 08:00–10:00 am. We will  
31 determine glucose, insulin and O'Sullivan. In the study population women will be  
32 routinely screened for gestational diabetes at 22–26 weeks of gestation with a nonfasting  
33 oral glucose challenge test in which venous blood will be sampled 1 hour after a 50-g oral  
34 glucose load. If the 1-hour glucose result are at least 140 mg / dL, the participant will be  
35 referred to a 100-g fasting glucose 3-hour tolerance test. Normal results will be a blood  
36 glucose below 1055 mg / dL at baseline, below 190 mg / dL at 1 hour, below 165 mg /  
37 dL at 2 hours, and below 145 mg / dL at 3 hours.  
38  
39  
40

41 *Physical activity:* PA will be measured using:

42  
43  
44 The Spanish version of the Pregnancy Physical Activity Questionnaire (PPAQ)[16]. This  
45 self-administered questionnaire contains 32 items which measure the frequency and  
46 duration of PA during pregnancy (1<sup>st</sup>, 2<sup>nd</sup> and 3<sup>rd</sup> visit), in terms of: being sedentary, doing  
47 household chores/care, work-related activity and sports activities.  
48  
49

50 Accelerometry will use Actigraph brand GT3X accelerometers to objectively measure  
51 PA levels during the three trimesters of pregnancy and during the postpartum period.  
52 Accelerometry has been used in several population groups, including pregnant women,  
53 to quantify PA and relate the data obtained with other factors [17]. The criteria for the  
54 inclusion of data in the analysis of results will be a minimum recording of 4 days,  
55 including at least three weekdays and one weekend day, with imperceptible recording of  
56 600 minutes per day[18,19]. The device will be worn on an elastic strap on the wrist of  
57 the non-dominant hand during seven consecutive days and nights, except for bathing and  
58  
59  
60

1  
2  
3 performing activities in the water, in each one of the measurements (*Figure 1*). The data  
4 gathering interval in this study will last for 60 seconds (epochs), as this has been shown  
5 to be valid for measuring PA in adults. The accelerometer will also supply information  
6 on posture, sleep latency, total sleep time, sleep efficiency, the intensity of PA, periods  
7 of activity, periods of sedentary behaviour, rhythm intervals, gross acceleration, energy  
8 consumption, MET ratios and the number of steps [20]. All subjects will be verbally and  
9 in writing instructed on how to use the accelerometer. Data will be downloaded using  
10 Actilife v6. 13. 3 software.  
11  
12  
13

14 To identify the factors which influence carrying out PA the Spanish version of the  
15 Pregnancy Symptoms Inventory (PSI) will be used [21] during pregnancy, while the  
16 Edinburg depression scale will be used in the postpartum period[22]. The PSI is a self-  
17 administered questionnaire that evaluates the frequency and degree of limitation of  
18 everyday activities arising due to different causes (not at all, a little, a lot) involving 41  
19 intrinsic symptoms of pregnancy. The Edinburgh scale consists of 10 questions with four  
20 possible replies, of which the subjects must choose one based on how they felt over the  
21 past seven days. Although the final score will indicate the probability of post-natal  
22 depression, it will not vary according to its severity.  
23  
24  
25  
26

27 *Variables associated with nutritional habits:* the “Young Adolescents’ Nutrition  
28 Assessment on Computer” (YANA-C) [23] will be used, together with the Mediterranean  
29 diet adherence questionnaire (PREDIMED) [24] to gather data on the diet of pregnant and  
30 postpartum women.  
31  
32

33 YANA-C consists of listing the foods consumed in the previous 24 hours, and it is divided  
34 into breakfast, mid-morning, lunch, tea, dinner and after dinner. Energy (kcal) and  
35 macronutrient intake (percentages) will be measured by two non-consecutive 24-h recalls  
36 (weekday and weekend day), using YANA-C software program. Percentages of Energy  
37 intake from carbohydrate, protein, fat and macronutrients (g) relative to weight (kg) will  
38 be calculated.  
39  
40  
41  
42

43 PREDIMED is a self-administered questionnaire containing 14 questions that are  
44 answered by a score showing low (< 9 points) or good adhesion to the Mediterranean diet  
45 (> 9 points).  
46  
47

48 *Pregnancy data:* duration of pregnancy (weeks and days of amenorrhea, according to the  
49 date of the last period and confirmation by ultrasound scan), medical problems during  
50 pregnancy (Yes/No) premature birth (fewer than 37 weeks' gestational age), arterial  
51 hypertension, gestational diabetes (defined according to the criteria of the American  
52 Diabetes Association (ADA) [25], fetal growth restriction and a reduction in amniotic  
53 fluid).  
54  
55

56 *Birth data:* type of analgesia during birth (none, epidural, spinal), onset of birth  
57 (spontaneous / induced, reason for induction), duration of pregnancy (weeks and days),  
58 type of birth (natural, instrumental, caesarean), reasons for an instrumental or caesarean  
59  
60

1  
2  
3 birth, episiotomy (yes/no), perineal tear (yes/no, grade I/II/III/IV), type of birth  
4 (spontaneous, manual, directed), duration of dilation (minutes), duration of expulsion  
5 (minutes).  
6

7  
8 *Neonatal data:* weight (grams), sex (male/female), 1/5 minutes APGAR scale score, type  
9 of reanimation (I/II/III/IV), umbilical cord blood pH (arterial and venous), fetal calotte  
10 pH (if performed).  
11

12  
13 *Postpartum data:* bleeding (physiological/moderate/severe), condition of perineum  
14 (haematoma/oedema/pain/haemorrhoids/suture dehiscence) and postpartum  
15 complications.  
16

17  
18 Data corresponding to pregnancy, birth, the newborn baby and in the postpartum period  
19 will be obtained from the clinical history of the mother.  
20

### 21 Patient and public involvement

22  
23 There was no patient or public involvement in the design of this protocol.  
24

### 25 Statistical analysis

26  
27 Sample size has been calculated using *Epidat 4.1*, with an exposed/non-exposed  
28 ratio of 1. The outcome variable will be gestational diabetes mellitus. A prevalence of  
29 14% is assumed in the group of exposed (sedentary) women and a prevalence of 3% is  
30 assumed in the group of non-exposed women (who are active according to the current  
31 criteria of the American College of Sports Medicine- 30 minutes/day of moderately  
32 intense PA every day or almost every day, accumulating at least 150 min/week). A 5%  
33 alpha error and 80% statistical power will be assumed. Following these premises, it will  
34 be estimated that 194 pregnant women should be included in the study. Approximately  
35 5% should be added to these premises to account for possible non-responders (women  
36 who do not wish to take part in the study) and drop-outs.  
37

38  
39 Descriptive statistics with precision estimates will be used to report the prevalence  
40 of each parameter using a cross-sectional data. Mixed regression models will be used to  
41 examine the relationship between dependent variables and patient health, measured using  
42 one or more explanatory variables that express exposure to a risk factor and controlling  
43 for baseline values. The results will be expressed as absolute differences in changes in  
44 variables between the baseline and final measurements (95% confidence interval)  
45

46 All statistical analyses will be performed with the statistical software IBM® SPSS®  
47 Statistics 24, and the level of significance will be set at  $p < 0.05$ .  
48  
49

### 50 **Discussion**

51  
52 Adherence to an exercise routine is influenced by factors such as: the habit of  
53 exercising prior to pregnancy, sociocultural level, equality and the insistence by  
54 healthcare workers that pregnant women undertake PA. The study by Nascimento et al.  
55 [26] showed that half of the women taking part ceased doing physical activity during  
56 pregnancy.  
57  
58  
59  
60

1  
2  
3 It is therefore important that healthcare personnel offer information on the risks  
4 and benefits of PA, while also setting personalised guidelines adapted to the specific  
5 needs of each woman. All of the information supplied to future mothers must be supported  
6 by scientific evidence. The aim is to guide future mothers towards a healthy lifestyle and  
7 to change their habits. This is not only to prevent pathologies during pregnancy and in the  
8 postpartum period, but rather to ensure that their new habits last throughout their life.  
9  
10  
11

12 The study results will make it possible to better advise pregnant women about  
13 recommendable PA and nutrition. They will also make it possible to update health  
14 education programs for this population group, leading to many benefits for mothers as  
15 well as their children.  
16  
17

18 The study will also record biochemical parameters which, in association with the  
19 data gathered using the scales and accelerometer, will make it possible to prevent the risk  
20 of non-transmissible diseases during pregnancy and in the postpartum period.  
21 Biochemical changes are closely linked to the amount of mothers' PA and the quality and  
22 type of their diet during pregnancy and in the postpartum period. An example of this  
23 relationship is the use of the biochemical parameter of glucose as a gestational diabetes  
24 marker. Pérez-Ferre et al. [11,27] intervened in a group of women with gestational  
25 diabetes, changing their dietary habits and encouraging physical exercise. They found  
26 that the risk of developing type 2 diabetes in the future fell in the intervention group in  
27 comparison with the control group [11]  
28  
29  
30  
31

32 Several limitations to our study should be considered. First of all, as with any  
33 observational study, we cannot eliminate residual confounding by unmeasured factors.  
34 However, we will be able include information on previously identified factors such as  
35 age, BMI before pregnancy and race / ethnicity, and consider other sociodemographic  
36 characteristics. Secondly, it is possible that accelerometers may produce some reactivity  
37 by the participants (Hawthorne effect) in wearing the device; however, unlike self-  
38 reports, accelerometer estimates do not suffer from bias due to social desirability and  
39 recall problems. Finally, the Yana- C questionnaire has not been validated in pregnant  
40 women. To control this limitation, we will use a self-administered questionnaire about  
41 good adherence to the Mediterranean diet (PREDIMED).  
42  
43  
44  
45

46 Larger studies like ours are therefore necessary which quantify the PA of women  
47 during pregnancy and in the postpartum period, to set guidelines based on scientific  
48 evidence. The present study will help identify the frequency, duration, intensity and type  
49 of PA in pregnant women and their impact on delivery, mother and new-born outcomes.  
50 This information will promote education for health by health professionals and involve  
51 practice in these women.  
52  
53  
54

#### 55 **Abbreviations:**

56 PA, Physical Activity; ACOG, American College of Obstetricians and Gynaecologists;  
57 WHO, World Health Organization; PSI, Pregnancy Symptoms Inventory; SESCAM,  
58  
59  
60



1  
2  
3 Castilla -La Mancha Health Service; THC, Toledo Hospital Complex; BMI, Body mass  
4 index; PPAQ, Pregnancy Physical Activity Questionnaire; PSI, Pregnancy Symptoms  
5 Inventory; YANA-C, Young Adolescents' Nutrition Assessment on Computer;  
6 PREDIMED, Mediterranean diet adherence questionnaire; ADA, American Diabetes  
7 Association.  
8  
9

## 10 **Declarations:**

### 11 a. Ethics and Dissemination

12  
13  
14  
15 This research project has been approved by the Toledo Hospital Complex (THC)  
16 Clinical Research Ethics Committee, approval number 125. It has also been approved by  
17 the Primary and Specialised Care Nursing Boards for implementation and development.  
18

19  
20 Before they sign the consent document to take part in the study, all the participants  
21 will be informed verbally and in writing about the study procedure as well as its  
22 objectives. Data confidentiality will be guaranteed, and it will also be possible for  
23 participants to revoke their consent for the study at any stage of the same.  
24

25  
26 Study outcomes will be disseminated at international conferences and published  
27 in peer-reviewed scientific journals.  
28

### 29 b. Consent for publication

30  
31 Not applicable  
32

### 33 c. Availability of data and material

34  
35 The data supporting our findings are contained within the manuscript.  
36

### 37 d. Conflicts of interests

38  
39 The authors declare that they have no competing interests and they have no commercial  
40 or public commitments that would prevent them from undertaking this research.  
41

### 42 e. Funding

43  
44 This research did not receive any specific grant from funding agencies in the public,  
45 commercial, or not-for-profit sectors.  
46

### 47 f. Author Statement

48  
49 Conceived and designed the experiments: AMM, MMDA, MVA, SGC and NAP., JLGP,  
50 BGL, BMG, SGC and NAP gave statistical and epidemiological support. Contributed  
51 reagents/ materials/analysis tools: AMM, MMDA, MVA, BGL, BMG. Wrote the paper:  
52 AMM, SGC and NAP. All authors established the methods and questionnaires, provided  
53 comments on the drafts, and read and approved the final version.  
54

### 55 g. Acknowledgements

We thank the healthcare facilities of Castilla -La Mancha Health Service (SESCAM), in the areas of Primary and Specialised healthcare: i) Buenavista Health Centre; ii) Santa Bárbara Health Centre; iii) Yepes Health Centre; iv) Polán Health Centre and v) the Virgen de la Salud Hospital, that have shown their interest in participating in our study.

## References

1. Muktabhant B, Lawrie TA, Lumbiganon P, Laopaiboon M. Diet or exercise, or both, for preventing excessive weight gain in pregnancy. *Cochrane Database Syst Rev.* 2015;(6).
2. Aune D, Saugstad OD, Henriksen T, Tonstad S. Physical activity and the risk of preeclampsia: a systematic review and meta-analysis. *Epidemiology.* 2014;25(3):331–343.
3. Clapp III JF, Lopez B, Harcar-Sevcik R. Neonatal behavioral profile of the offspring of women who continued to exercise regularly throughout pregnancy. *Am J Obstet Gynecol.* 1999;180(1):91–94.
4. Artal R, O'Toole M. Exercise during pregnancy and the postpartum period. *Clin Obstet Gynecol.* 2003;46(2):496–499.
5. Organization WH. WHO guidelines approved by the guidelines review committee. Use Tuberc Interferon-Gamma Release Assays IGRAs Low-Middle-Income Ctries Policy Statement Geneva World Health Organ. 2011;
6. Vallim AL, Osis MJ, Cecatti JG, Baciuk ÉP, Silveira C, Cavalcante SR. Water exercises and quality of life during pregnancy. *Reprod Health.* 2011;8(1):14.
7. Kramer MS, McDonald SW. Aerobic exercise for women during pregnancy. *Cochrane Database Syst Rev.* 2006;(3).
8. Olmedo-Requena R, Fernández JG, Prieto CA, Moreno JM, Bueno-Cavanillas A, Jiménez-Moleón JJ. Factors associated with a low adherence to a Mediterranean diet pattern in healthy Spanish women before pregnancy. *Public Health Nutr.* 2014;17(3):648–656.
9. Timmermans S, Steegers-Theunissen R, Vujkovic M, den Breeijen H, Russcher H, Lindemans J, et al. The Mediterranean diet and fetal size parameters: the Generation R Study. 2014;
10. Mesa SLR, Sosa BEP. Implicaciones del estado nutricional materno en el peso al nacer del neonato. *Perspect En Nutr Humana.* 2011;11(2):179–186.
11. Pérez-Ferre N, Del Valle L, Torrejón MJ, Barca I, Calvo MI, Matía P, et al. Diabetes mellitus and abnormal glucose tolerance development after gestational diabetes: A three-year, prospective, randomized, clinical-based, Mediterranean lifestyle interventional study with parallel groups. *Clin Nutr.* 2015;34(4):579–585.

12. Karamanos B, Thanopoulou A, Anastasiou E, Assaad-Khalil S, Albache N, Bachaoui M, et al. Relation of the Mediterranean diet with the incidence of gestational diabetes. *Eur J Clin Nutr.* 2014;68(1):8.
13. Amorim AR, Rössner S, Neovius M, Lourenço PM, Linné Y. Does excess pregnancy weight gain constitute a major risk for increasing long-term BMI? *Obesity.* 2007;15(5):1278–1286.
14. Gomez Cantarino S, Comas Matas M, Velasco A, Campos S, Santos AP dos, Puerto Fernandez I del. Vivencias, experiências e diferenças sexuais: mulher puérpera espanhola e imigrante. *Área Palma sanitária de Maiorca (Espanha). Rev Enferm Referência.* 2016;(9):115–123.
15. Magann EF, Evans SF, Weitz B, Newnham J. Antepartum, intrapartum, and neonatal significance of exercise on healthy low-risk pregnant working women. *Obstet Gynecol.* 2002;99(3):466–472.
16. Chasan-Taber L, Schmidt MD, Roberts DE, Hosmer D, Markenson G, Freedson PS. Development and validation of a pregnancy physical activity questionnaire: Corrigendum. *Med Sci Sports Exerc.* 2011;43(1).
17. Aguilar MC, Sánchez AL, Guisado RB, Rodríguez RB, Noack JS, Pozo MC. Accelerometer description as a method to assess physical activity in different periods of life; systematic review. 2014.
18. Trost SG, Mciver KL, Pate RR. Conducting accelerometer-based activity assessments in field-based research. *Med Sci Sports Exerc.* 2005;37(11 Suppl):S531–43.
19. Freedson PS, Melanson E, Sirard J. Calibration of the Computer Science and Applications, Inc. accelerometer. *Med Sci Sports Exerc.* 1998;30(5):777–781.
20. Chen KY, Bassett DR Jr. The technology of accelerometry-based activity monitors: current and future. *Med Sci Sports Exerc.* 2005;37(11):S490–S500.
21. Foxcroft KF, Callaway LK, Byrne NM, Webster J. Development and validation of a pregnancy symptoms inventory. *BMC Pregnancy Childbirth.* 2013;13(1):3.
22. Vega-Dienstmaier JM, Mazzotti Suarez G, Campos Sanchez M. Validación de una versión en español de la Escala de Depresión Postnatal de Edimburgo. *Actas Esp Psiquiatr.* 2002;30(2):106–111.
23. Vereecken CA, Covents M, Matthys C, Maes L. Young adolescents' nutrition assessment on computer (YANA-C). *Eur J Clin Nutr.* 2005;59(5):658.
24. Martínez-González MÁ, Corella D, Salas-Salvadó J, Ros E, Covas MI, Fiol M, et al. Cohort profile: design and methods of the PREDIMED study. *Int J Epidemiol.* 2010;41(2):377–385.
25. Association AD. 2. Classification and diagnosis of diabetes. *Diabetes Care.* 2017;40(Supplement 1):S11–S24.

- 1  
2  
3  
4  
5  
6  
7  
8  
9  
10  
11  
12  
13  
14  
15  
16  
17  
18  
19  
20  
21  
22  
23  
24  
25  
26  
27  
28  
29  
30  
31  
32  
33  
34  
35  
36  
37  
38  
39  
40  
41  
42  
43  
44  
45  
46  
47  
48  
49  
50  
51  
52  
53  
54  
55  
56  
57  
58  
59  
60
26. Nascimento SL, Surita FG, Godoy AC, Kasawara KT, Morais SS. Physical activity patterns and factors related to exercise during pregnancy: a cross sectional study. *PloS One*. 2015;10(6):e0128953.
27. Sanabria-Martínez G, García-Hermoso A, Poyatos-León R, Álvarez-Bueno C, Sánchez-López M, Martínez-Vizcaíno V. Effectiveness of physical activity interventions on preventing gestational diabetes mellitus and excessive maternal weight gain: a meta-analysis. *BJOG Int J Obstet Gynaecol*. 2015;122(9):1167–1174.

### Figure Legends

Fig. 1. Data gathering phases. AP, arterial blood pressure; BMI, body mass index.

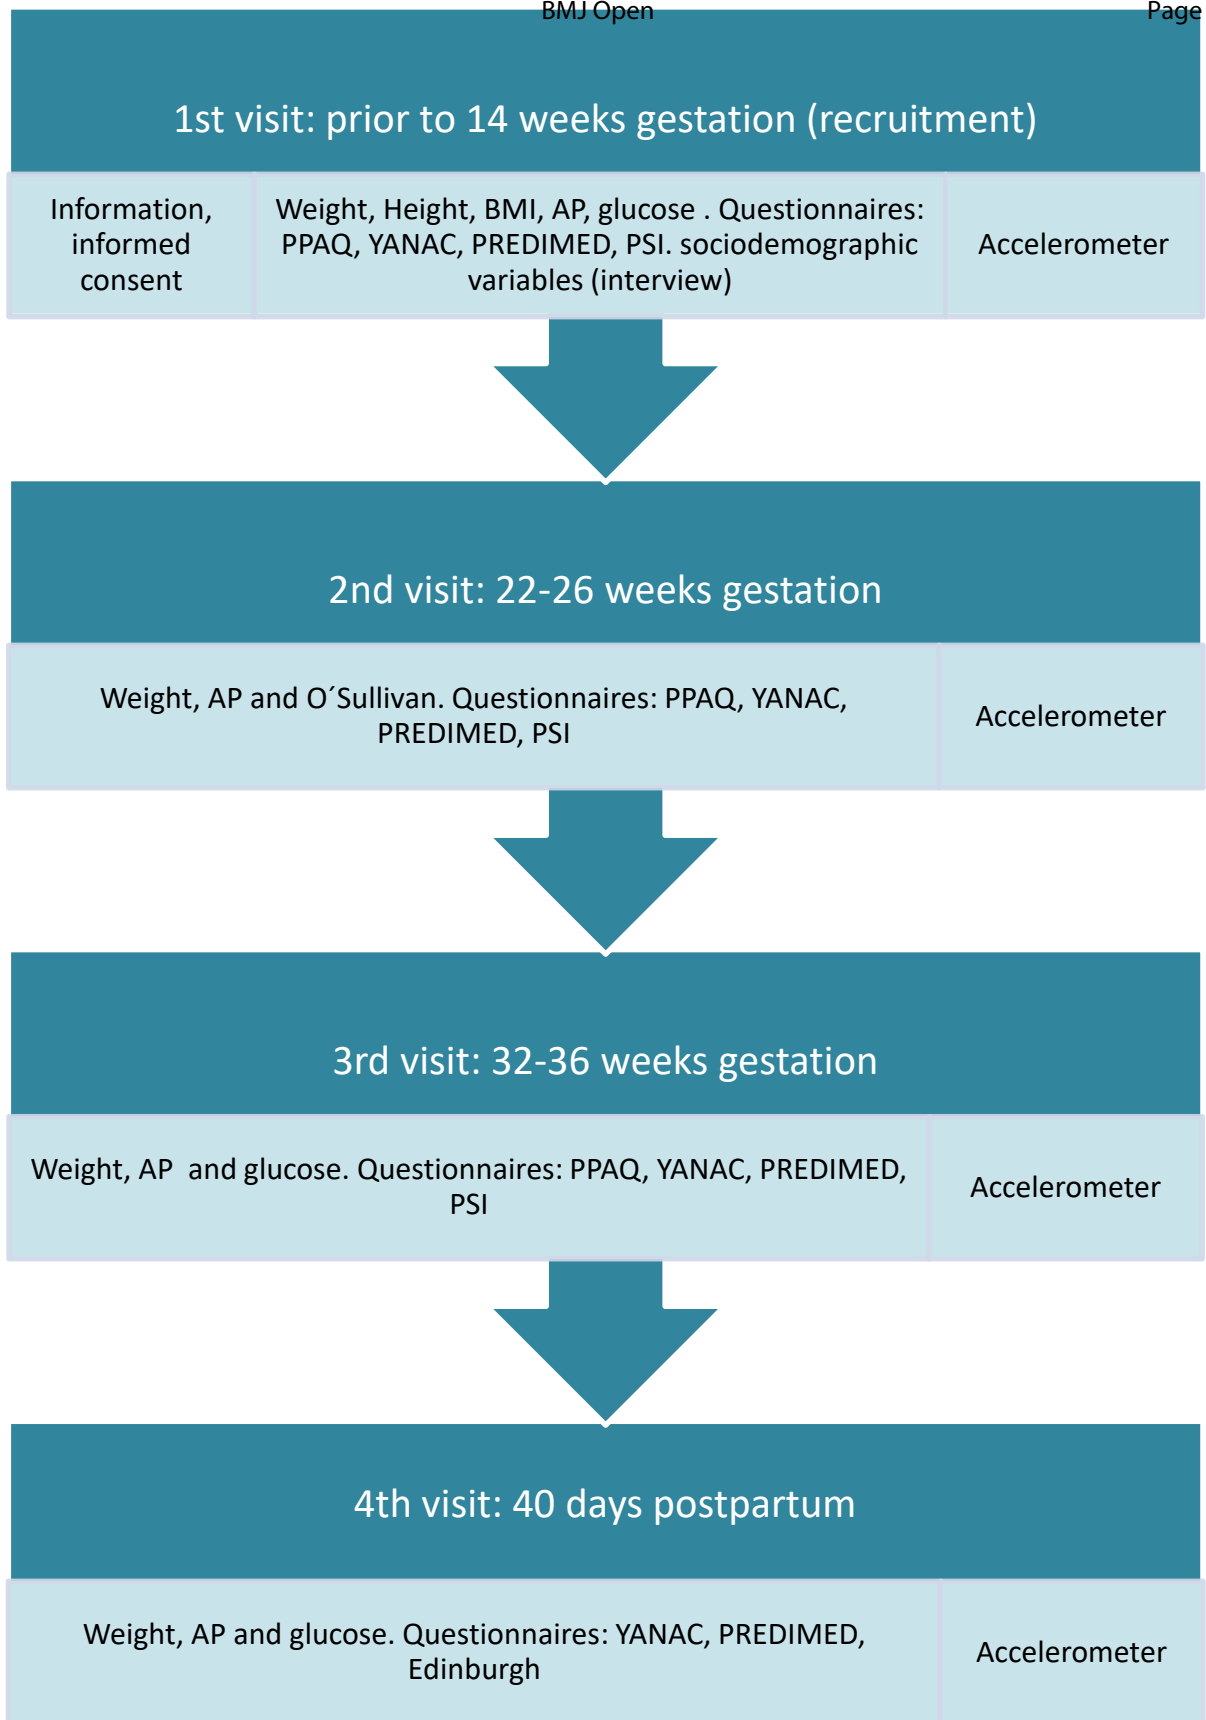

Fig. 1. Data gathering phases. AP, arterial blood pressure; BMI, body mass index.

# BMJ Open

## Analysis of nutritional habits and levels of physical activity during pregnancy, birth and the postpartum period of women in health area no. 1, Toledo (Spain). The PrePaN study protocol.

|                                 |                                                                                                                                                                                                                                                                                                                                                                                                                                                                                                                                                                                                                                                                                                                                                                                                                                                                                                                                                                                                                                                                                                                                                                                                                                                                                                                                                                                                |
|---------------------------------|------------------------------------------------------------------------------------------------------------------------------------------------------------------------------------------------------------------------------------------------------------------------------------------------------------------------------------------------------------------------------------------------------------------------------------------------------------------------------------------------------------------------------------------------------------------------------------------------------------------------------------------------------------------------------------------------------------------------------------------------------------------------------------------------------------------------------------------------------------------------------------------------------------------------------------------------------------------------------------------------------------------------------------------------------------------------------------------------------------------------------------------------------------------------------------------------------------------------------------------------------------------------------------------------------------------------------------------------------------------------------------------------|
| Journal:                        | <i>BMJ Open</i>                                                                                                                                                                                                                                                                                                                                                                                                                                                                                                                                                                                                                                                                                                                                                                                                                                                                                                                                                                                                                                                                                                                                                                                                                                                                                                                                                                                |
| Manuscript ID                   | bmjopen-2019-029487.R2                                                                                                                                                                                                                                                                                                                                                                                                                                                                                                                                                                                                                                                                                                                                                                                                                                                                                                                                                                                                                                                                                                                                                                                                                                                                                                                                                                         |
| Article Type:                   | Protocol                                                                                                                                                                                                                                                                                                                                                                                                                                                                                                                                                                                                                                                                                                                                                                                                                                                                                                                                                                                                                                                                                                                                                                                                                                                                                                                                                                                       |
| Date Submitted by the Author:   | 09-Jun-2019                                                                                                                                                                                                                                                                                                                                                                                                                                                                                                                                                                                                                                                                                                                                                                                                                                                                                                                                                                                                                                                                                                                                                                                                                                                                                                                                                                                    |
| Complete List of Authors:       | Muñoz Muñoz, Aránzazu; Universidad de Castilla-La Mancha - Campus de Toledo, Nursing, Physiotherapy and Occupational Therapy Department; Buenavista Primary Care Centre, SESCAM.<br>Cantarino, Sagrario; Universidad de Castilla-La Mancha - Campus de Toledo, Nursing, Physiotherapy and Occupational Therapy Department, De Dios Aguado, María de las Mercedes; Universidad de Castilla-La Mancha - Campus de Toledo, Nursing, Physiotherapy and Occupational Therapy Department;; Yepes Primary Care Centre<br>Velasco Abellán, Minerva; Universidad de Castilla-La Mancha - Campus de Toledo, Nursing, Physiotherapy and Occupational Therapy Department;; Department of Emergency. Castilla-La Mancha Health System<br>González López, Beatriz; Universidad de Castilla-La Mancha - Campus de Toledo, Nursing, Physiotherapy and Occupational Therapy Department;; Polan Primary Care Centre<br>Molina Gallego, Brigida; Universidad de Castilla-La Mancha - Campus de Toledo, Nursing, Physiotherapy and Occupational Therapy Department;; FENNSI Group, Hospital Nacional de Paraplégicos<br>González Pascual, Juan Luis; Universidad Europea de Madrid, School of Biomedical and Health Sciences; Nursing Department.<br>Arias Palencia, Natalia María; Universidad de Castilla- La Mancha, School of Education; Universidad de castilla- La Mancha, Health and Social Research Center |
| <b>Primary Subject Heading</b>: | Obstetrics and gynaecology                                                                                                                                                                                                                                                                                                                                                                                                                                                                                                                                                                                                                                                                                                                                                                                                                                                                                                                                                                                                                                                                                                                                                                                                                                                                                                                                                                     |
| Secondary Subject Heading:      | Obstetrics and gynaecology                                                                                                                                                                                                                                                                                                                                                                                                                                                                                                                                                                                                                                                                                                                                                                                                                                                                                                                                                                                                                                                                                                                                                                                                                                                                                                                                                                     |
| Keywords:                       | accelerometer, pregnancy outcomes, physical activity, neonatal outcomes                                                                                                                                                                                                                                                                                                                                                                                                                                                                                                                                                                                                                                                                                                                                                                                                                                                                                                                                                                                                                                                                                                                                                                                                                                                                                                                        |
|                                 |                                                                                                                                                                                                                                                                                                                                                                                                                                                                                                                                                                                                                                                                                                                                                                                                                                                                                                                                                                                                                                                                                                                                                                                                                                                                                                                                                                                                |

SCHOLARONE™  
Manuscripts

1  
2  
3  
4  
5  
6  
7  
8  
9  
10  
11  
12  
13  
14  
15  
16  
17  
18  
19  
20  
21  
22  
23  
24  
25  
26  
27  
28  
29  
30  
31  
32  
33  
34  
35  
36  
37  
38  
39  
40  
41  
42  
43  
44  
45  
46  
47  
48  
49  
50  
51  
52  
53  
54  
55  
56  
57  
58  
59  
60

1  
2  
3 **Analysis of nutritional habits and levels of physical activity during pregnancy, birth**  
4 **and the postpartum period of women in health area no. 1, Toledo (Spain). The**  
5 **PrePaN study protocol.**  
6  
7

8 Muñoz Muñoz, Aránzazu <sup>1,2</sup>; Gómez Cantarino, Sagrario<sup>1</sup>; De Dios Aguado, María De  
9 Las Mercedes <sup>1,3</sup>; Velasco Abellán, Minerva <sup>1,4</sup>; González López, Beatriz <sup>1,5</sup>; Molina  
10 Gallego, Brígida <sup>1,6</sup>; González Pascual, Juan Luis <sup>7</sup>; Arias Palencia, Natalia María <sup>8,9</sup>.  
11  
12

13  
14 1- ENDOCU Group, University School of Nursing and Physiotherapy Toledo (Nursing,  
15 pain and Care), Toledo, Spain.

16 2- Buenavista Primary Care Centre, SESCAM, Toledo, Spain.

17 3- Yepes Primary Centre, SESCAM, Toledo, Spain.

18 4- Department of Emergency. Castilla-La Mancha Health System, Toledo, Spain.

19 5- Polan Primary Care Centre, SESCAM, Toledo, Spain

20 6- FENNSI Group, Hospital Nacional de Paraplégicos, SESCAM, Toledo, Spain.

21 7- School of Biomedical and Health Sciences; Nursing Department. Universidad Europea  
22 de Madrid, Madrid, Spain.

23 8- School of Education, Universidad de Castilla-La Mancha, Cuenca, Spain.

24 9- Health and Social Research Center, Universidad de Castilla-La Mancha, Cuenca,  
25 Spain.  
26  
27

28  
29  
30  
31 E-mails authors:

32 [ara\\_mnz@hotmail.com](mailto:ara_mnz@hotmail.com)

33 [Sagrario.gomez@uclm.es](mailto:Sagrario.gomez@uclm.es)

34 [mded@sescam.jccm.es](mailto:mded@sescam.jccm.es)

35 [minerva.velasco@uclm.es](mailto:minerva.velasco@uclm.es)

36 [begolo@sescam.jccm.es](mailto:begolo@sescam.jccm.es)

37 [Brigida.molina@uclm.es](mailto:Brigida.molina@uclm.es)

38 [juanluis.gonzalez2@universidadeuropea.es](mailto:juanluis.gonzalez2@universidadeuropea.es)

39 [Natalia.arias@uclm.es](mailto:Natalia.arias@uclm.es)  
40  
41  
42  
43

44 Corresponding author:

45 Sagrario Gómez Cantarino. Department of Nursing, Physiotherapy and occupational  
46 therapy. School of Nursing and Physiotherapy Toledo, University of Castilla- La Mancha,  
47 Toledo, Spain.

48 Avd/ Carlos III s/n, 45071, Toledo, Spain.

49 [Sagrario.gomez@uclm.es](mailto:Sagrario.gomez@uclm.es)

50 +34670225048  
51  
52  
53  
54  
55

56 **Key words:** accelerometer, neonatal outcomes, physical activity, pregnancy outcomes.

57 **Word count:** 2787  
58  
59  
60



## Abstract

Introduction: Pregnant women who eat a balanced diet usually practice physical activity (PA) regularly; there are many studies on PA during pregnancy and the results for the mother and baby. However, the guideline for PA during pregnancy is very general and is not quantified. The primary objective of this study is to examine the nutritional habits and levels of PA of women during pregnancy and the postpartum period. Secondly, it will determine the effects of these aspects on the mother and newborn baby. Its third objective is to identify the factors which influence the practice of PA during this phase.

Methods and analysis: This is a prospective cohort study lasting two years. From September 2018 to September 2020. The sample will be recruited in three Primary Care centers in the Toledo (Spain) health area. The participants will be pregnant women aged from 18 to 40 years old who should attend all the check-ups during their pregnancy and the postpartum period. PA will be quantified using accelerometry, while nutritional habits and physical exercise will be evaluated using validated questionnaires. The symptoms of pregnancy and the postpartum period will be recorded, together with biochemical parameters and anthropometric data. The primary outcomes will be determined in the pregnant women: weight gain, the incidence of gestational diabetes mellitus, pre-eclampsia and pregnancy-induced hypertension. Secondary outcomes include duration of pregnancy and weight at birth, Apgar score (1 min/ 5 min), type of reanimation (I/II/III/IV), and umbilical cord blood pH in the newborn babies.

Discussion: although the beneficial effects of PA during pregnancy are known, there is a need to perform studies that quantify the amount of PA undertaken by women during pregnancy and the postpartum period. The objective of such studies is to establish science-based individualized guidelines for PA for women during this stage of their lives.

## Strengths and limitations

-This research will offer new information about how pregnant and postpartum women, like their neonates, respond to moderate physical activity without showing adverse effects.

-The study will offers new information about nutritional behavior of pregnant women, the impact of diet on their newborn and the influence on the mother's puerperium.

The Yana- C questionnaire has not been validated in pregnant women.

To control for the limitation mentioned above we will use a self-administered questionnaire about good adhesion to the Mediterranean diet (PREDIMED).

## Introduction

When women are pregnant, they take better care of their health and are more receptive and likely to make changes that lead to a healthier lifestyle. Recommendations to increase physical activity (PA) and to eat a healthy diet therefore have a positive effect throughout pregnancy and the postpartum period on the mother as well as their newborn baby [1].

1  
2  
3 The scientific literature contains relevant information on the effects of moderate  
4 and regular PA during pregnancy: mothers gain less weight and reduce the risk of  
5 pregnancy-related diabetes, pre-eclampsia and hypertension [1, 2]; higher stress tolerance  
6 and earlier neonatal neuro-behavioural maturity [3]. Among other recommendations, the  
7 American College of Obstetricians and Gynaecologists (ACOG) suggests that pregnant  
8 women with no medical or obstetric complications should perform at least 30 minutes of  
9 moderate PA every day of the week [4]. Nevertheless, the World Health Organization  
10 (WHO) admits that further research is needed into guidelines for pregnant women on the  
11 amount of PA they should undertake. The WHO currently states that the general  
12 considerations for PA in adults also apply to pregnant women, i.e., at least 75 minutes of  
13 vigorous PA or 150 minutes of moderate PA per week, including the strengthening of the  
14 major muscle groups [5].

15  
16 On the other hand, several studies on the effects of physical exercise during pregnancy  
17 found no relevant benefits for the mother and even detected unsatisfactory results in  
18 comparison with other more sedentary mothers [6, 7]. All these considerations show the  
19 need for research to confirm the correct guideline for PA that leads to the greatest health  
20 benefits for mothers as well as their newborn babies.

21  
22 As well as being physically active, it is also recommended that women eat a healthy diet  
23 during pregnancy and the postpartum period. During this life stage, those women who eat  
24 a healthy diet were also found to do more exercise [8]. Data show that low adherence to  
25 the Mediterranean diet may be associated with a reduction in the weight of the placenta  
26 and low neonatal weight [9, 10], as well as the risk of pregnancy-associated diabetes in  
27 terms of the classification and diagnosis of diabetes [11], which indicates how important  
28 diet is during this phase of women's lives [12]. Epidemiological studies of pregnant  
29 women indicate that their weight prior to pregnancy, height, blood levels of glucose and  
30 weight gain during pregnancy are factors that influence fetal development [10].

31  
32 While it is important that mothers should not gain excessive weight during  
33 pregnancy, they should also return to their pre-pregnancy weight after giving birth. This  
34 is because there is an association between the risk of obesity after birth and excessive  
35 weight gain during pregnancy [13, 14]. On the other hand, controlling weight solely by  
36 diet after giving birth is less effective than a combination of diet and physical exercise  
37 [14]. The promotion of healthy habits in terms of a combination of diet and PA during  
38 pregnancy and the postpartum period may therefore be highly beneficial for women  
39 [15,16].

40  
41 The main objective of this research are to examine independently the nutritional  
42 habits and the levels of PA in women during pregnancy and the postpartum period by  
43 means of validated questionnaires and accelerometers.

44  
45 The secondary objectives are:

46  
47 i) To calculate the relationship between the level of PA and nutritional habits during  
48 pregnancy and the postpartum period in terms of the results for mothers in: weight gain,  
49 the incidence of pregnancy-related diabetes mellitus, pre-eclampsia and pregnancy-  
50 induced hypertension and type of birth. This relationship is also examined in terms of the  
51 results for newborn babies: duration of pregnancy, weight at birth, Apgar score 1 min / 5  
52 min, type of reanimation and umbilical cord blood pH.

1  
2  
3 ii) To identify the factors that influence the performance of PA during each stage of  
4 pregnancy and the postpartum period (using the Spanish version of the Pregnancy  
5 Symptoms Inventory “PSI” and the Edinburgh scale).  
6  
7

## 8 **Methods/Design**

9

10 A two-year study of cohorts during pregnancy and the postpartum period in Health  
11 Area No. 1, Toledo (Spain).  
12  
13

14 A multicentre study will be undertaken in the healthcare facilities of Castilla -La  
15 Mancha Health Service (SESCAM), in the areas of Primary and Specialised healthcare:  
16 i) Buenavista Health Centre; ii) Santa Bárbara Health Centre; iii) Yepes Health Centre;  
17 iv) Polán Health Centre and v) the Virgen de la Salud Hospital.  
18  
19

20 The sample will be recruited by matrons by means of non-probabilistic  
21 consecutive sampling in Primary Care facilities.  
22  
23

24 Study recruitment started on 01 September 2018 and the study is expected to last  
25 until September 2020.  
26

### 27 Inclusion criteria:

28

- 29 i) Women aged from 18 to 40 years old.  
30  
31 ii) Pregnancy having lasted 14 weeks or less.  
32  
33 iii) A single foetus.  
34  
35 iv) Quarterly pregnancy check-ups in Primary Care facilities.  
36  
37 v) The intention of giving birth in the Virgen de la Salud Hospital.  
38  
39 vi) Comprehension of spoken and written Spanish.  
40  
41

### 42 Exclusion criteria:

43

- 44 i) Women with conditions prior to pregnancy that hinder or limit the practice of PA at the  
45 time of recruitment (one or more contraindications for PA according to the ACOG,  
46 diabetes or arterial hypertension prior to pregnancy, or more than one previous abortion).  
47  
48 ii) Not signing the informed consent document.  
49  
50 iii) Not understanding written and spoken Spanish.  
51  
52 iv) Women who do not complete the follow-up.  
53  
54

### 55 Variables (Figure 1):

56

57 *Sociodemographic variables:* the following data will be recorded in the first interview  
58 age (years), marital status (married, single, living with partner, others), country of origin,  
59  
60

1  
2  
3 educational level (none, primary, secondary, technical college, university), economic  
4 resources (low, medium or high), working status (housewife, unemployed, in work).  
5

6  
7 *Anthropometrics:* all measurements will be taken by trained investigators to minimize  
8 inter-observer variability, using the same apparatus: scales (mechanical, with a range up  
9 to: max. 220 kg d=50g) and a wall-mounted height gauge (range: 0 to 200 cm). The  
10 subjects will be measured in the 1<sup>st</sup>, 2<sup>nd</sup>, 3<sup>rd</sup> and 4<sup>th</sup> (postpartum) visit in the morning for  
11 weight (without shoes and in light clothing) and height (standing upright without shoes  
12 and with the median sagittal line touching the board) will be measured in the first visit.  
13 The average of two measurements will be taken. Body mass index (BMI) will be  
14 calculated as body mass (in kilograms) divided by height<sup>2</sup> (in metres).  
15  
16

17  
18 *Arterial blood pressure:* will be measured twice, with a 5-min interval between  
19 measurements. The first measurement will be made after at least 5 min rest. Women will  
20 be seated, in relaxing conditions, with the right arm semi-flexed at heart level. Blood  
21 pressure will be measured with an Omron M5-I monitor (Omron Healthcare UK Ltd.).  
22  
23

24 *Biochemical parameters:*

25  
26 Study data will be collected by trained research staff. All blood samples will be taken  
27 from the right or left cubital fossa, after an 8–12 h fast, between 08:00–10:00 am. We will  
28 determine glucose, insulin and O'Sullivan. In the study population women will be  
29 routinely screened for gestational diabetes at 22–26 weeks of gestation with a nonfasting  
30 oral glucose challenge test in which venous blood will be sampled 1 hour after a 50-g oral  
31 glucose load. If the 1-hour glucose result are at least 140 mg / dL, the participant will be  
32 referred to a 100-g fasting glucose 3-hour tolerance test. Normal results will be a blood  
33 glucose below 1055 mg / dL at baseline, below 190 mg / dL at 1 hour, below 165 mg /  
34 dL at 2 hours, and below 145 mg / dL at 3 hours.  
35  
36  
37  
38

39 *Physical activity:* PA will be measured using:

40  
41 The Spanish version of the Pregnancy Physical Activity Questionnaire (PPAQ) [17]. This  
42 self-administered questionnaire contains 32 items which measure the frequency and  
43 duration of PA during pregnancy (1<sup>st</sup>, 2<sup>nd</sup> and 3<sup>rd</sup> visit), in terms of: being sedentary, doing  
44 household chores/care, work-related activity and sports activities.  
45  
46

47 Accelerometry will use Actigraph brand GT3X accelerometers to objectively measure  
48 PA levels during the three trimesters of pregnancy and during the postpartum period.  
49 Accelerometry has been used in several population groups, including pregnant women,  
50 to quantify PA and relate the data obtained with other factors [18]. The criteria for the  
51 inclusion of data in the analysis of results will be a minimum recording of 4 days,  
52 including at least three weekdays and one weekend day, with imperceptible recording of  
53 600 minutes per day [19, 20]. The device will be worn on an elastic strap on the wrist of  
54 the non-dominant hand during seven consecutive days and nights, except for bathing and  
55 performing activities in the water, in each one of the measurements (*Figure 1*). The data  
56 gathering interval in this study will last for 60 seconds (epochs), as this has been shown  
57  
58  
59  
60

1  
2  
3 to be valid for measuring PA in adults. The accelerometer will also supply information  
4 on posture, sleep latency, total sleep time, sleep efficiency, the intensity of PA, periods  
5 of activity, periods of sedentary behaviour, rhythm intervals, gross acceleration, energy  
6 consumption, MET ratios and the number of steps [21]. All subjects will be verbally and  
7 in writing instructed on how to use the accelerometer. Data will be downloaded using  
8 Actilife v6. 13. 3 software.  
9  
10

11  
12 To identify the factors which influence carrying out PA the Spanish version of the  
13 Pregnancy Symptoms Inventory (PSI) will be used [22] during pregnancy, while the  
14 Edinburg depression scale will be used in the postpartum period [23]. The PSI is a self-  
15 administered questionnaire that evaluates the frequency and degree of limitation of  
16 everyday activities arising due to different causes (not at all, a little, a lot) involving 41  
17 intrinsic symptoms of pregnancy. The Edinburgh scale consists of 10 questions with four  
18 possible replies, of which the subjects must choose one based on how they felt over the  
19 past seven days. Although the final score will indicate the probability of post-natal  
20 depression, it will not vary according to its severity.  
21  
22

23  
24 *Variables associated with nutritional habits:* the “Young Adolescents’ Nutrition  
25 Assessment on Computer” (YANA-C) [24] will be used, together with the Mediterranean  
26 diet adherence questionnaire (PREDIMED) [25] to gather data on the diet of pregnant  
27 and postpartum women.  
28  
29

30  
31 YANA-C consists of listing the foods consumed in the previous 24 hours, and it is divided  
32 into breakfast, mid-morning, lunch, tea, dinner and after dinner. Energy (kcal) and  
33 macronutrient intake (percentages) will be measured by two non-consecutive 24-h recalls  
34  
35 (weekday and weekend day), using YANA-C software program. Percentages of Energy  
36 intake from carbohydrate, protein, fat and macronutrients (g) relative to weight (kg) will  
37 be calculated.  
38  
39

40  
41 PREDIMED is a self-administered questionnaire containing 14 questions that are  
42 answered by a score showing low (< 9 points) or good adhesion to the Mediterranean diet  
43 (> 9 points).  
44

45  
46 *Pregnancy data:* duration of pregnancy (weeks and days of amenorrhea, according to the  
47 date of the last period and confirmation by ultrasound scan), medical problems during  
48 pregnancy (Yes/No) premature birth (fewer than 37 weeks' gestational age), arterial  
49 hypertension, gestational diabetes (defined according to the criteria of the American  
50 Diabetes Association (ADA) [26], fetal growth restriction and a reduction in amniotic  
51 fluid).  
52  
53

54  
55 *Birth data:* type of analgesia during birth (none, epidural, spinal), onset of birth  
56 (spontaneous / induced, reason for induction), duration of pregnancy (weeks and days),  
57 type of birth (natural, instrumental, caesarean), reasons for an instrumental or caesarean  
58 birth, episiotomy (yes/no), perineal tear (yes/no, grade I/II/III/IV), type of birth  
59  
60

(spontaneous, manual, directed), duration of dilation (minutes), duration of expulsion (minutes).

*Neonatal data:* weight (grams), sex (male/female), 1/5 minutes APGAR scale score, type of reanimation (I/II/III/IV), umbilical cord blood pH (arterial and venous), fetal calotte pH (if performed).

*Postpartum data:* bleeding (physiological/moderate/severe), condition of perineum (haematoma/oedema/pain/haemorrhoids/suture dehiscence) and postpartum complications.

Data corresponding to pregnancy, birth, the newborn baby and in the postpartum period will be obtained from the clinical history of the mother.

### Patient and public involvement

There was no patient or public involvement in the design of this protocol.

### Statistical analysis

Sample size was calculated using *Epidat 4.1*, with an exposed/non-exposed ratio of 1. The outcome variable was gestational diabetes mellitus. A prevalence of 14% was assumed in the group of exposed (sedentary) women and a prevalence of 3% [27] was assumed in the group of non-exposed women (who were active according to the current criteria of the American College of Sports Medicine- 30 minutes/day of moderately intense PA every day or almost every day, accumulating at least 150 min/week). A 5% alpha error and 80% statistical power were assumed. Following these premises, it was estimated that 194 pregnant women should be included in the study. Approximately 5% should be added to these premises to account for possible non-responders (women who did not wish to take part in the study) and drop-outs.

Descriptive statistics with precision estimates will be used to report the prevalence of each parameter using a cross-sectional data. Mixed regression models will be used to examine the relationship between dependent variables and patient health, measured using one or more explanatory variables that express exposure to a risk factor and controlling for baseline values. The results will be expressed as absolute differences in changes in variables between the baseline and final measurements (95% confidence interval). All statistical analyses will be performed with the statistical software IBM® SPSS® Statistics 24, and the level of significance will be set at  $p < 0.05$ .

### **Discussion**

The results of the study will allow better advise to pregnant women about PA and nutrition. They will also make it possible to update health education programs for this population group, leading to more benefits for mothers as well as their children.

The adherence to an exercise routine is influenced by factors such as: the habit of exercising before pregnancy, the sociocultural level, equality and the insistence by

1  
2  
3 healthcare workers that pregnant women perform PA. The study by Nascimento et al.  
4 (2015) showed that half of the participating women stopped doing physical activity during  
5 pregnancy [28].  
6  
7

8 Therefore, it is important that healthcare professional provide information about  
9 the risks and benefits of PA, while establishing personalized guidelines adapted to the  
10 specific needs of each woman. All information supplied to future mothers must therefore  
11 be supported by scientific evidence [29]. The goal is to guide future mothers towards a  
12 healthy lifestyle and to change their habits. This is not only to prevent pathologies during  
13 pregnancy and in the postpartum period, but rather to ensure that their new habits last a  
14 lifetime.  
15  
16  
17

18 The study will also record biochemical parameters which, in association with the  
19 data collected through the scales and the accelerometer, will allow to prevent the risk of  
20 non-transmissible diseases during pregnancy and in the postpartum period. Biochemical  
21 changes are closely linked to the amount of mothers' PA, and both the quality and type  
22 of their diet during pregnancy and in the postpartum period. An example of this  
23 relationship is the use of the biochemical parameter of glucose as a gestational diabetes  
24 marker [30]. Pérez-Ferre et al. (2015) intervened in a group of women with gestational  
25 diabetes, by changing their dietary habits and encouraging physical exercise. They found  
26 that the risk of developing type 2 diabetes in the future decreased in the intervention group  
27 compared to the control group [11].  
28  
29  
30  
31  
32

33 Therefore, it is necessary to perform more extensive studies on the quantity of PA  
34 of women during pregnancy and in the postpartum period, to set guidelines based on  
35 scientific evidence. Accelerometers provide reliable and accurate data, and they may be  
36 considered a motivating factor in maternal education programs, as they make pregnant  
37 women aware of the amount of PA they perform, thereby stimulating the regular practice  
38 of PA.  
39  
40  
41

#### 42 **Abbreviations:**

43  
44 PA, Physical Activity; ACOG, American College of Obstetricians and Gynaecologists;  
45 WHO, World Health Organization; PSI, Pregnancy Symptoms Inventory; SESCO,   
46 Castilla-La Mancha Health Service; THC, Toledo Hospital Complex; BMI, Body mass  
47 index; PPAQ, Pregnancy Physical Activity Questionnaire; PSI, Pregnancy Symptoms  
48 Inventory; YANA-C, Young Adolescents' Nutrition Assessment on Computer;  
49 PREDIMED, Mediterranean diet adherence questionnaire; ADA, American Diabetes  
50 Association.  
51  
52  
53  
54  
55

#### 56 **Declarations:**

57  
58 a. Ethics and Dissemination  
59  
60

1  
2  
3 This research project has been approved by the Toledo Hospital Complex (THC)  
4 Clinical Research Ethics Committee, approval number 125. It has also been approved by  
5 the Primary and Specialised Care Nursing Boards for implementation and development.  
6  
7

8 Before they sign the consent document to take part in the study, all the participants  
9 will be informed verbally and in writing about the study procedure as well as its  
10 objectives. Data confidentiality will be guaranteed, and it will also be possible for  
11 participants to revoke their consent for the study at any stage of the same.  
12  
13

14 Study outcomes will be disseminated at international conferences and published  
15 in peer-reviewed scientific journals.  
16  
17

#### 18 b. Consent for publication

19 Not applicable  
20  
21

#### 22 c. Availability of data and material

23 The data supporting our findings are contained within the manuscript.  
24  
25

#### 26 d. Conflicts of interests

27 The authors declare that they have no competing interests and they have no commercial  
28 or public commitments that would prevent them from undertaking this research.  
29  
30

#### 31 e. Funding

32 This research did not receive any specific grant from funding agencies in the public,  
33 commercial, or not-for-profit sectors.  
34  
35

#### 36 f. Author Statement

37 Conceived and designed the experiments: AMM, MMDA, MVA, SGC and NAP., JLGP,  
38 BGL, BMG, SGC and NAP gave statistical and epidemiological support. Contributed  
39 reagents/ materials/analysis tools: AMM, MMDA, MVA, BGL, BMG. Wrote the paper:  
40 AMM, SGC and NAP. All authors established the methods and questionnaires, provided  
41 comments on the drafts, and read and approved the final version.  
42  
43

#### 44 g. Acknowledgements

45 We thank the healthcare facilities of Castilla -La Mancha Health Service (SESCAM), in  
46 the areas of Primary and Specialised healthcare: i) Buenavista Health Centre; ii) Santa  
47 Bárbara Health Centre; iii) Yepes Health Centre; iv) Polán Health Centre and v) the  
48 Virgen de la Salud Hospital, that have shown their interest in participating in our study.  
49  
50

#### 51 References

52  
53  
54  
55  
56  
57  
58  
59  
60 1 Muktabhant B, Lawrie TA, Lumbiganon P, *et al.* Diet or exercise, or both, for



1  
2  
3 preventing excessive weight gain in pregnancy. *Cochrane Database Syst Rev* 2015.

4  
5 2 Aune D, Saugstad OD, Henriksen T, *et al*. Physical activity and the risk of  
6 preeclampsia: a systematic review and meta-analysis. *Epidemiology* 2014;**25**:331–343.

7  
8 3 Clapp III JF, Lopez B, Harcar-Sevcik R. Neonatal behavioral profile of the  
9 offspring of women who continued to exercise regularly throughout pregnancy. *Am J*  
10 *Obstet Gynecol* 1999;**180**:91–94.

11  
12 4 Artal R, O'Toole M. Exercise during pregnancy and the postpartum period. *Clin*  
13 *Obstet Gynecol* 2003;**46**:496–499.

14  
15 5 Organization WH. WHO guidelines approved by the guidelines review  
16 committee. *Use Tuberc Interferon-Gamma Release Assays IGRAs Low- Middle-Income*  
17 *Ctries Policy Statement Geneva World Health Organ* 2011.

18  
19 6 Vallim AL, Osis MJ, Cecatti JG, *et al*. Water exercises and quality of life during  
20 pregnancy. *Reprod Health* 2011;**8**:14.

21  
22 7 Kramer MS, McDonald SW. Aerobic exercise for women during pregnancy.  
23 *Cochrane Database Syst Rev* 2006.

24  
25 8 Olmedo-Requena R, Fernández JG, Prieto CA, *et al*. Factors associated with a  
26 low adherence to a Mediterranean diet pattern in healthy Spanish women before  
27 pregnancy. *Public Health Nutr* 2014;**17**:648–656.

28  
29 9 Timmermans S, Steegers-Theunissen R, Vujkovic M, *et al*. The Mediterranean  
30 diet and fetal size parameters: the Generation R Study. 2014.

31  
32 10 Mesa SLR, Sosa BEP. Implicaciones del estado nutricional materno en el peso al  
33 nacer del neonato. *Perspect En Nutr Humana* 2011;**11**:179–186.

34  
35 11 Pérez-Ferre N, Del Valle L, Torrejón MJ, *et al*. Diabetes mellitus and abnormal  
36 glucose tolerance development after gestational diabetes: A three-year, prospective,  
37 randomized, clinical-based, Mediterranean lifestyle interventional study with parallel  
38 groups. *Clin Nutr* 2015;**34**:579–585.

39  
40 12 Karamanos B, Thanopoulou A, Anastasiou E, *et al*. Relation of the  
41 Mediterranean diet with the incidence of gestational diabetes. *Eur J Clin Nutr*  
42 2014;**68**:8.

43  
44 13 Amorim AR, Rössner S, Neovius M, *et al*. Does excess pregnancy weight gain  
45 constitute a major risk for increasing long-term BMI? *Obesity* 2007;**15**:1278–1286.

46  
47 14 Adegboye ARA, Linne YM. Diet or exercise, or both, for weight reduction in  
48 women after childbirth. *Cochrane Database Syst Rev* 2013.

49  
50 15 Gomez Cantarino S, Comas Matas M, Velasco A, *et al*. Vivencias, experiências  
51 e diferenças sexuais: mulher puérpera espanhola e imigrante. Área Palma sanitária de  
52  
53  
54  
55  
56  
57  
58  
59  
60

- 1  
2  
3 Maiorca (Espanha). *Rev Enferm Referência* 2016;:115–123.  
4  
5 16 Magann EF, Evans SF, Weitz B, *et al.* Antepartum, intrapartum, and neonatal  
6 significance of exercise on healthy low-risk pregnant working women. *Obstet Gynecol*  
7 2002;**99**:466–472.  
8  
9  
10 17 Chasan-Taber L, Schmidt MD, Roberts DE, *et al.* Development and validation  
11 of a pregnancy physical activity questionnaire: Corrigendum. *Med Sci Sports Exerc*  
12 2011;**43**.  
13  
14 18 Aguilar MC, Sánchez AL, Guisado RB, *et al.* *Accelerometer description as a*  
15 *method to assess physical activity in different periods of life; systematic review.* 2014.  
16  
17 19 Trost SG, Mciver KL, Pate RR. Conducting accelerometer-based activity  
18 assessments in field-based research. *Med Sci Sports Exerc* 2005;**37**:S531–43.  
19  
20 20 Freedson PS, Melanson E, Sirard J. Calibration of the Computer Science and  
21 Applications, Inc. accelerometer. *Med Sci Sports Exerc* 1998;**30**:777–781.  
22  
23 21 Chen KY, DAVID R BASSETT J. The technology of accelerometry-based  
24 activity monitors: current and future. *Med Sci Sports Exerc* 2005;**37**:S490–S500.  
25  
26 22 Foxcroft KF, Callaway LK, Byrne NM, *et al.* Development and validation of a  
27 pregnancy symptoms inventory. *BMC Pregnancy Childbirth* 2013;**13**:3.  
28  
29 23 Vega-Dienstmaier JM, Mazzotti Suarez G, Campos Sanchez M. Validación de  
30 una versión en español de la Escala de Depresión Postnatal de Edimburgo. *Actas Esp*  
31 *Psiquiatr* 2002;**30**:106–111.  
32  
33 24 Vereecken CA, Covents M, Matthys C, *et al.* Young adolescents' nutrition  
34 assessment on computer (YANA-C). *Eur J Clin Nutr* 2005;**59**:658.  
35  
36 25 Martínez-González MÁ, Corella D, Salas-Salvado J, *et al.* Cohort profile: design  
37 and methods of the PREDIMED study. *Int J Epidemiol* 2010;**41**:377–385.  
38  
39 26 Association AD. 2. Classification and diagnosis of diabetes. *Diabetes Care*  
40 2017;**40**:S11–S24.  
41  
42 27 Han S, Middleton P, Crowther CA. Exercise for pregnant women for preventing  
43 gestational diabetes mellitus. *Cochrane Database Syst Rev* 2012.  
44  
45 28 Nascimento SL, Surita FG, Godoy AC, *et al.* Physical activity patterns and  
46 factors related to exercise during pregnancy: a cross sectional study. *PloS One*  
47 2015;**10**:e0128953.  
48  
49 29 Poyatos-León R, Sanabria-Martínez G, García-Prieto JC, *et al.* A follow-up  
50 study to assess the determinants and consequences of physical activity in pregnant  
51 women of Cuenca, Spain. *BMC Public Health* 2016;**16**:437.  
52  
53  
54  
55  
56  
57  
58  
59  
60

1  
2  
3 30 Sanabria-Martínez G, García-Hermoso A, Poyatos-León R, *et al.* Effectiveness  
4 of physical activity interventions on preventing gestational diabetes mellitus and  
5 excessive maternal weight gain: a meta-analysis. *BJOG Int J Obstet Gynaecol*  
6 2015;**122**:1167–1174.  
7  
8  
9  
10  
11  
12

### 13 **Figure Legends**

14  
15 Fig. 1. Data gathering phases. AP, arterial blood pressure; BMI, body mass index.  
16  
17  
18  
19  
20  
21  
22  
23  
24  
25  
26  
27  
28  
29  
30  
31  
32  
33  
34  
35  
36  
37  
38  
39  
40  
41  
42  
43  
44  
45  
46  
47  
48  
49  
50  
51  
52  
53  
54  
55  
56  
57  
58  
59  
60



Fig. 1. Data gathering phases. AP, arterial blood pressure; BMI, body mass index.
